## 1 **Infection of human lymphomononuclear cells by SARS-CoV-2**

2  
3 Marjorie C Pontelli<sup>1</sup>, Italo A Castro<sup>\*\*1</sup>, Ronaldo B Martins<sup>1</sup>, Flávio P Veras<sup>2</sup>,  
4 Leonardo LaSerra<sup>1</sup>, Daniele C Nascimento<sup>2</sup>, Ricardo S Cardoso<sup>1</sup>, Roberta  
5 Rosales<sup>6</sup>, Diego B Caetité<sup>2</sup>, Mikhael H F de Lima<sup>2</sup>, Thais M Lima<sup>1</sup>, Juliano P  
6 Souza<sup>1</sup>, Juliana T Kawahisa<sup>2</sup>, Marcela C Giannini<sup>2,3</sup>, Letícia P Bonjorno<sup>2,3</sup>,  
7 Maria I F Lopes<sup>2,3</sup>, Sabrina S Batah<sup>8</sup>, Li Siyuan<sup>8</sup>, Rodrigo L Assad<sup>2,3</sup>, Sergio C L  
8 Almeida<sup>2,3</sup>, Fabiola R Oliveira<sup>2,3</sup>, Maíra N Benatti<sup>2,3</sup>, Lorena L F Pontes<sup>7</sup>,  
9 Rodrigo C Santana<sup>2,4</sup>, Fernando C Vilar<sup>2,4</sup>, Maria A Martins<sup>2,5</sup>, Thiago M  
10 Cunha<sup>2</sup>, Rodrigo T Calado<sup>7</sup>, José C Alves-Filho<sup>2</sup>, Dario S Zamboni<sup>2,6</sup>, Alexandre  
11 Fabro<sup>8</sup>, Paulo Louzada-Junior<sup>2,3</sup>, Rene D R Oliveira<sup>2,3</sup>, Fernando Q Cunha<sup>2</sup>,  
12 Eurico Arruda<sup>\*1</sup>.

13  
14 1 Virology Research Center, Ribeirao Preto Medical School; 2 Center of  
15 Research in Inflammatory Diseases (CRID), 3 Divisions of Clinical Immunology;  
16 4 Infectious Diseases, 5 Intensive Care Unit; 6 Department of Cell and  
17 Molecular Biology and Pathogenic Bioagents, Ribeirao Preto Medical School; 7  
18 Blood Center of Ribeirao Preto, Ribeirao Preto, Brazil; 8 Department of  
19 Pathology, Ribeirao Preto Medical School,  
20 University of Sao Paulo, Ribeirao Preto, Sao Paulo, Brazil

21  
22 +Contributed equally to the study

23 \*Corresponding authors:

24  
25 Italo Araujo Castro; Virology Research Center, Ribeirao Preto Medical School,  
26 3900 Bandeirantes Av, 14049-900, Ribeirao Preto –SP – Brazil. Tel.: +55 16  
27 33154508, Email: [italo.a.castro@gmail.com](mailto:italo.a.castro@gmail.com)

28  
29 Eurico Arruda; Virology Research Center, Ribeirao Preto Medical School, 3900  
30 Bandeirantes Av, 14049-900, Ribeirao Preto –SP – Brazil. Tel.: +55 16  
31 33153337, Email: [eaneto@fmrp.usp.br](mailto:eaneto@fmrp.usp.br)

32

33           **Abstract.** Although SARS-CoV-2 severe infection is associated with a  
34 hyperinflammatory state, lymphopenia is an immunological hallmark, and  
35 correlates with poor prognosis in COVID-19. However, it remains unknown if  
36 circulating human lymphocytes and monocytes are susceptible to SARS-CoV-2  
37 infection. In this study, SARS-CoV-2 infection of human peripheral blood  
38 mononuclear cells (PBMCs) was investigated both *in vitro* and *in vivo*. We found  
39 that *in vitro* infection of whole PBMCs from healthy donors was productive of virus  
40 progeny. Results revealed that monocytes, as well as B and T lymphocytes, are  
41 susceptible to SARS-CoV-2 active infection and viral replication was indicated by  
42 detection of double-stranded RNA. Moreover, flow cytometry and  
43 immunofluorescence analysis revealed that SARS-CoV-2 was frequently  
44 detected in monocytes and B lymphocytes from COVID-19 patients, and less  
45 frequently in CD4<sup>+</sup>T lymphocytes. The rates of SARS-CoV-2-infected monocytes  
46 in PBMCs from COVID-19 patients increased over time from symptom onset.  
47 Additionally, SARS-CoV-2-positive monocytes and B and CD4<sup>+</sup>T lymphocytes  
48 were detected by immunohistochemistry in post mortem lung tissue. SARS-CoV-  
49 2 infection of blood circulating leukocytes in COVID-19 patients may have  
50 important implications for disease pathogenesis, immune dysfunction, and virus  
51 spread within the host.

52

53

## 54 Introduction

55

56 In December 2019, a new coronavirus emerged as the cause of a severe  
57 acute respiratory disease named Coronavirus-related disease 2019 (COVID-  
58 19). The virus that spilled over to humans in China was classified in the family  
59 *Coronaviridae*, genus *Betacoronavirus*, and was named Severe Acute  
60 Respiratory Syndrome Coronavirus 2 (SARS-CoV-2), for its similarity to SARS-  
61 CoV [1].

62 Since its emergence, SARS-CoV-2 has spread to 185 countries/political  
63 regions and infected more than 11 million people worldwide, with a death toll of  
64 approximately 500,000 cases. The main clinical features of COVID-19 are fever,  
65 dry cough, dyspnea and myalgia, but some patients rapidly evolve to severe  
66 respiratory distress syndrome [2].

67 Previous studies have shown that inflammatory cytokine storm and  
68 lymphocytopenia are important markers of severe COVID-19 cases, with severe  
69 functional exhaustion of TCD4+ and TCD8+ lymphocytes [2–4]. Interestingly,  
70 peripheral blood mononuclear cells (PBMCs) from COVID-19 patients showed  
71 upregulation of autophagy and apoptosis pathways [5], suggesting that  
72 dampening of the immune system by SARS-CoV-2 infection may have a strong  
73 impact on the clinical outcome of severe COVID-19.

74 A decrease in circulating lymphocytes has been associated with poor  
75 COVID-19 outcome, but it is still unclear whether that lymphopenia is directly  
76 due to SARS-CoV-2 infection of lymphocytes with consequent cell death.  
77 SARS-CoV-2 interacts with target cells via binding of its major surface  
78 glycoprotein spike (S) with the angiotensin-converting enzyme 2 (ACE2)  
79 present in the cell membrane [6]. ACE2-independent cell-entry has also been  
80 reported and could be an alternative mechanism of SARS-CoV-2 entry in cells  
81 with low ACE2 expression [7]. Cleavage of the S protein is required for efficient  
82 entry of SARS-CoV-2, which is accomplished by transmembrane serine  
83 protease TMPRSS2 [6].

84 In addition to respiratory disease, COVID-19 patients frequently develop  
85 gastrointestinal symptoms, which is in keeping with the high expression of  
86 TMPRSS2 and ACE2 documented in enterocytes [8]. Furthermore, the SARS-

87 CoV-2 antigen was found *post mortem* in the spleen and lymph nodes with  
88 pathological signs of damage. In these organs, monocytes do contain viral  
89 antigens, but it was not clear whether this was due to active viral replication or  
90 phagocytosis, nor if monocytes become infected before reaching secondary  
91 lymphoid tissues [9]. While SARS-CoV-2 causes viremia, until now, infectious  
92 SARS-CoV-2 was not successfully isolated from peripheral blood in COVID-19  
93 patients, and it is suggested that the virus in blood may be cell-associated [5, 9].  
94 In this study, we investigated the susceptibility and permissiveness of human  
95 peripheral blood mononuclear cells (PBMC) to SARS-CoV-2. We found that  
96 PBMCs are susceptible and permissive to SARS-CoV-2 infection, both *in vivo*  
97 and *ex vivo*, which seems to play a direct role in the reduction of circulating  
98 lymphocytes.

99

## 100 **Patients and Methods**

101

102 **Ethical statement and COVID-19 patients.** The study was approved by the  
103 National Ethics Committee (CONEP, CAAE: 30248420.9.0000.5440 and  
104 31797820.8.0000.5440). A total of 29 hospitalized patients were enrolled, all  
105 with clinical and radiological features of COVID-19 and confirmed SARS-CoV-2  
106 infection by RT-PCR in respiratory secretions, with detection of specific IgM or  
107 IgG antibodies to SARS-CoV-2. Clinical features, laboratory results and drug  
108 therapies are summarized in **Supplementary Table 1**. For all comparisons, 12  
109 age and gender-matching healthy controls were also enrolled. Written informed  
110 consent was obtained for both patients and healthy controls.

111

112 **Production of mouse anti-SARS-CoV-2 hyperimmune serum.** Male C57Bl/6  
113 mice were bred and maintained under specific pathogen-free conditions at the  
114 animal facility of the Ribeirão Preto Medical School (FMRP) at University of São  
115 Paulo. The protocol for production of mouse hyperimmune serum were carried  
116 out with 8-week-old male mice following the institutional guidelines on ethics in  
117 animal experiments and was approved by the University of São Paulo Ethics  
118 Committee for Animal Experimental Research - CETEA (Protocol no. 001/2020-  
119 1). To immunize animals, virus stock was inactivated by adding formaldehyde to



120 a final concentration of 0.2%, and incubated overnight at 37°C. Then, virus was  
121 purified by ultracentrifugation (10% sucrose cushion, 159.000 × g for 1h). The  
122 pellet was resuspended with Phosphate Buffer Saline (PBS) 1x and stored at -  
123 20°C. In order to confirm inactivation, titration of the inactivated product was  
124 done both by TCID<sub>50</sub> and by plaque assay in Vero-E6 cells with 5-day  
125 incubation, without any cytopathic effects. Three C57Bl/6 mice were inoculated  
126 intramuscularly with an emulsion containing the equivalent of 10<sup>6</sup> TCID<sub>50</sub> of  
127 inactivated SARS-CoV-2 in complete Freund's adjuvant (CFA, BD, cat. 263810)  
128 diluted 1:1 in PBS. Boosts were given with inactivated SARS-CoV-2 in  
129 incomplete Freund's adjuvant (without *M. tuberculosis*, IFA, BD, cat. 263910) on  
130 days 7 and 14 after the first immunization. One week after the last dose,  
131 animals were euthanized with an excess of anesthetics xylazine (60 mg/kg) and  
132 ketamine (300 mg/kg), following exsanguination by cardiac puncture. Animal  
133 serum conversion was evaluated by indirect immunofluorescence using slide  
134 preparations of SARS-CoV-2 infected Caco-2 cells, fixed with 4%  
135 paraformaldehyde and AlexaFluor 488-labelled rabbit anti-mouse secondary  
136 antibody. Coverslips were analyzed using an optic microscope (Olympus  
137 BX40).

138

139 **Isolation of peripheral blood mononuclear cells (PBMCs).** Human PBMCs  
140 were isolated from COVID-19 patients or healthy donors by density gradient  
141 using Percoll (GE Healthcare, cat. 17-5445-01), as previously described [10,  
142 11]. PBMCs were washed, resuspended in RPMI 1640 supplemented with 10%  
143 fetal bovine serum (FBS) and kept on ice until further use.

144

145 **Virus and cell lines.** The passage 1 (P1) of SARS-CoV-2 Brazil/SPBR-02/2020  
146 isolate obtained in Vero-E6 from a COVID-19 patient in Sao Paulo was kindly  
147 provided by Prof. Edison Durigon (ICB-USP). P1 was diluted 1:1000 in  
148 Dulbecco's modified Eagle's medium (DMEM) and inoculated in Vero-E6 cells  
149 monolayers to produce the P2 stock. For stock titration, serial 10-fold dilutions  
150 were inoculated in quadruplicate monolayers of Vero-E6 cells and incubated at  
151 37°C in 5% CO<sub>2</sub>. On the fourth day of incubation, the presence of cytopathic  
152 effect (CPE) was recorded (**Supplementary Fig 1A**) and titers were expressed  
153 as the 50% tissue culture infectious dose (TCID<sub>50</sub>), using the Reed-Muench

154 method after 4 days of incubation. All experiments involving SARS-CoV-2  
155 propagation were done in biosafety level 3 laboratory.

156

157 ***In vitro* infection of PBMCs.** For these experiments,  $10^6$  PBMCs from 5  
158 healthy donors were infected with SARS-CoV-2 (MOI=1) in RPMI with 0% FBS  
159 at RT for 1 h under orbital agitation. Next, cells were pelleted at  $300 \times g$ , the  
160 inoculum was washed and replaced by RPMI with 2% FBS and cells were  
161 incubated at  $37^\circ\text{C}$  in 5%  $\text{CO}_2$ . As controls, equivalent quantities of cells were  
162 exposed to UV-inactivated SARS-CoV-2 and treated in the same way. We also  
163 used a control consisting of cells treated with 20 mM of  $\text{NH}_4\text{Cl}$  starting 20 min  
164 before infection and maintained throughout the entire incubation period.  
165 Supernatants from PBMCs were collected at 0, 6, 12, 24 and 48 h post-infection  
166 and subjected to serial ten-fold dilutions to determine virus titers by  $\text{TCID}_{50}$ , as  
167 previously described.

168

169 **RNA extraction and real-time RT-PCR.** SARS-CoV-2 RNA detection was  
170 done with primer-probe sets for SARS-CoV-2 according to the USA-CDC  
171 protocol, targeting the virus N1 gene, and using the RNase-P housekeeping  
172 gene as control, by one-step real-time RT-PCR. Total RNA was extracted with  
173 Trizol® (Invitrogen, CA, EUA) from 250 $\mu\text{L}$  of homogenized cell pellets and  
174 supernatants from in vitro assays. All real-time PCR assays were done on a  
175 Step-One Plus thermocycler (Applied Biosystems, Foster City, CA, USA).  
176 Briefly, after Trizol® extraction, 100 ng of RNA was used for genome  
177 amplification with N1 primers (20  $\mu\text{M}$ ) and probe (5  $\mu\text{M}$ ), and TaqPath 1-Step  
178 qRT-PCR Master Mix (Applied Biosystems, Foster City, CA, USA), with the  
179 following parameters:  $25^\circ\text{C}$  for 2 min,  $50^\circ\text{C}$  for 15 min,  $95^\circ\text{C}$  for 2 min, followed  
180 by 45 cycles of  $94^\circ\text{C}$  for 5 s and  $60^\circ\text{C}$  for 30s. Viral loads of SARS-COV-2 were  
181 determined using a standard curve prepared with a plasmid containing a 944bp  
182 amplicon, which includes all three targets for the sets of primers/probes  
183 designed by CDC protocol (N1, N2 and N3), inserted into a TA cloning vector  
184 (PTZ57R/T CloneJet™ Cloning Kit Thermo Fisher®). Results of viral RNA  
185 quantifications by one-step qRT-PCR were plotted with GraphPad® Prism 8.4.2  
186 software.

187

188 **Indirect immunofluorescence staining of SARS-CoV-2 infected cells.**

189 Coverslips pre-treated with poly-lysine 0.1% (Sigma-Aldrich, cat. P8920) were  
190 incubated with isolated PBMCs from patients or healthy donors at 37°C, 20  
191 minutes for cell adherence. After that, coverslip-containing cells were fixed with  
192 4% paraformaldehyde (PFA) in PBS for 15 minutes, and then washed 3 times  
193 with PBS. To detect viral antigens in cells, we used serum from a recovered  
194 COVID-19 patient, which was first tested for specificity by immunofluorescence  
195 in SARS-CoV-2 infected Vero CCL81 cells (**Supplementary Fig 1B**). In  
196 addition, for each experiment using the referred serum we included cells from  
197 healthy donors or non-infected cells. As an isotype control of this serum, we  
198 used a human serum collected in 2016. Biotin-conjugated anti-human IgG  
199 (Sigma-Aldrich, cat. B-1140) was used as the secondary antibody, followed by  
200 amplification with the TSA Cyanine 3 System (Perkin Elmer, NEL704A001KT),  
201 following the manufacturer's protocol. To determine the phenotype of SARS-  
202 CoV-2-infected cells, we used primary antibodies for CD4 (Abcam cat.  
203 ab133616), CD8 (Abcam cat. ab4055), CD14 (Abcam cat. ab133335), CD19  
204 (Abcam cat. ab134114), CD20 (Abcam cat. ab103573). For detection of virus  
205 replication, we used anti-dsRNA J2 (dsRNA; English & Scientific Consulting Kft,  
206 Hungary), which binds to dsRNA of 40 bp or longer. Secondary antibodies used  
207 were polyclonal anti-rabbit conjugated with 488 (Thermo Fisher cat. A21202),  
208 594 (Abcam cat. ab150116) or 647 (Abcam cat. ab150079). The Golgi complex  
209 and nuclei staining were carried out using a mouse anti-GM130 (BD cat.  
210 610822) and 4',6-diamidino-2-phenylindole dihydrochloride dye (DAPI, Thermo  
211 Fisher cat. 62248), respectively.

212

213 **Confocal microscopy.** PBMCs from confirmed COVID-19 patients and from  
214 healthy control donors were stained with human serum containing antibodies to  
215 SARS-CoV-2, and with commercial antibodies to the different cell phenotypes,  
216 followed by the appropriate secondary antibodies. Preparations were analyzed  
217 in a Zeiss Confocal 780 microscope in a Tile 3x3 in a single focal plane. The  
218 quantity of SARS-CoV-2-positive cells of different phenotypes was quantified by  
219 using the analyze particles tool from Fiji by ImageJ.

220

221 **Flow cytometry.** Unseparated whole blood leukocyte samples from COVID-19  
222 patients or healthy donors infected in vitro with SARS-CoV-2 were surface  
223 stained with Fixable Viability Dye eFluor™ 780 (eBioscience) and monoclonal  
224 antibodies specific for CD3 (APC eBioscience cat. 17-0036-42), CD4 (PerCP-  
225 Cy5.5 BD cat. 560650), CD8 (PE-Cy7 BD cat. 557746), CD19 (APC BioLegend  
226 cat. 302212), CD14 (PerCP Abcam cat. ab91146), CD16 (PE eBioscience cat.  
227 12-0168-42), CCR2 (BV BioLegend cat. 357210) for 30 min at 4°C, according to  
228 manufacturer's instructions. Detection of SARS-CoV-2 by flow cytometry was  
229 performed with BD Cytofix/Cytoperm™ kit to enable access to intracellular  
230 antigens using mouse polyclonal antibody raised against formalin-inactivated  
231 SARS-CoV-2, as described early in this manuscript, for 15 min at 4°C. To  
232 ensure that viral detection was specific for replicating intracellular viruses,  
233 additional preparations of infected cells were stained without permeabilization.  
234 Treatment with trypsin for 60 min on ice after infection to remove surface-bound  
235 viral particles was also included as a second control (**Supplementary Fig 2**).  
236 SARS-CoV-2 antibodies were detected with secondary anti-Mouse Alexa488.  
237 Surface phosphatidylserine (PS) staining was carried out in whole blood using  
238 ApoScreen AnnexinV-FITC apoptosis kit (SouthernBiotech cat 10010-02),  
239 following manufacturer's guidelines. All data were acquired using a Verse or  
240 Canto flow cytometers (BD Biosciences) and subsequent analysis was done  
241 using FlowJo (TreeStar) software. Gating strategies are illustrated in  
242 **Supplementary Fig 3.**

243

244 **Serial immunohistochemistry.** Tissue sections from paraffin-embedded lung  
245 fragments obtained from two COVID-19 fatal cases were tested by  
246 immunohistochemistry (IHC) using anti-SARS-CoV-2 polyclonal antibody for in  
247 situ detection of SARS-CoV-2. Sequential immunoperoxidase labeling and  
248 erasing (SIMPLE) [12] was then performed to determine the  
249 immunophenotypes of SARS-CoV-2 infected cells, using antibodies to CD4  
250 (Abcam cat. ab133616 ), CD20 (Abcam cat. ab103573 ), CD14 (Abcam cat.  
251 ab133335 ) and IL-6 (BD cat. 554400). After each round of staining, slides were  
252 scanned using a VS120 ScanScope (Olympus ) under 400x magnification.  
253 Images were pseudocolored and overlaid in the first image of the preparation  
254 counterstained with hematoxylin using ImageJ v1.50b (NIH, USA) and Adobe

255 Photoshop CS5 software (Adobe Systems, San Jose, CA, USA). Lung paraffin-  
256 embedded tissue obtained from a fatal case of hantavirus infection in 2016 was  
257 used as a negative control for SARS-CoV-2 staining.

258

259 **Statistical analysis.** All descriptive statistics, patient stratification, and positive  
260 cell frequencies were done using GraphPad Prism Software, version 6.0.

261 Correlation analysis, one-way ANOVA, two-way ANOVA, linear regressions,

262 Holm-Sidak, and Bonferroni post-tests were also performed using GraphPad

263 Prism. Values of  $P < 0.05$  were considered significant, as described in all

264 figures.

265

266

## 267 **Results**

268

269 **SARS-CoV-2 infection of human PBMCs is productive.** Considering that  
270 human lymphocyte and monocyte lineages are susceptible to SARS-CoV-2  
271 infection *in vitro*, we sought to determine whether primary cultures of human  
272 PBMCs could also be infected. Therefore, PBMCs from five healthy donors  
273 were infected *in vitro* at a MOI=1. After 0, 6, 12, 24 and 48 hpi, supernatants  
274 were harvested, and virus progeny was titrated. SARS-CoV-2 titers peaked  
275 between 6 and 12 hpi, resulting in a 100-fold increase from the initial input, and  
276 decreased steadily thereof (**Fig 1A**). As expected, induction of general  
277 intracellular alkalization by treatment with NH<sub>4</sub>Cl reduced progeny production by  
278 approximately 1 Log<sub>10</sub> (p=0.017). Interestingly, virus progeny production was  
279 not entirely abolished by NH<sub>4</sub>Cl treatment, suggesting an entry pathway  
280 alternative to endosomal acidification in PBMCs (**Fig 1B**).

281       Coronavirus replication entails the formation of abundant double-  
282 stranded RNAs (dsRNA) in the cytoplasm of infected cells, and thus its  
283 intracellular detection is a reliable marker of viral replication. Therefore, infected  
284 PBMCs were stained for SARS-CoV-2 and dsRNA and analyzed by confocal  
285 microscopy. Most SARS-CoV-2-positive cells were also positive for dsRNA, and  
286 rates of double-positive cells counted at 6 hours post-infection followed a  
287 pattern that roughly matched the accumulation of progeny (**Fig. 1C**). The  
288 dsRNA staining was seen as clear puncta in SARS-CoV-2-infected cells, in a  
289 pattern suggestive of virus factories.

290

291 **Monocytes and T lymphocytes are the main targets of SARS-CoV-2 *in***  
292 ***vitro* infection.** To determine the susceptibility of circulating leukocytes to  
293 SARS-CoV-2, PBMCs from five healthy donors were infected (MOI=1), and  
294 analyzed the intracellular expression of SARS-CoV-2 antigens by flow  
295 cytometry. After 24 hpi, SARS-CoV-2 was detected in all immunophenotyped  
296 cells (**Fig 2A**). Monocytes were the most susceptible cell type, showing  
297 significant SARS-CoV-2 antigen staining (44.3%, p=0.039) (**Fig 2B**). In addition  
298 to monocytes, T CD4<sup>+</sup> (14.2%, p=0.028), CD8<sup>+</sup> (13.5%, p=0.019) and B  
299 lymphocytes (7.58%) were also susceptible to SARS-2 infection (**Fig 2C**).



300 Staining for SARS-CoV-2 was significantly reduced in cells treated with NH<sub>4</sub>Cl,  
301 suggesting that acidification is important for in vitro infection of PBMCs.

302

303 **Infection of T lymphocytes leads to cell death by apoptosis.** The COVID-  
304 19-related lymphocytopenia has been well described as a strong indicator of  
305 severe clinical outcomes in patients. Since we found both T CD4<sup>+</sup> and CD8<sup>+</sup>  
306 cells susceptible to SARS-2 infection *in vitro*, we investigated the presence of  
307 cell death in SARS-CoV-2-infected PBMCs from 5 healthy donors by the  
308 expression of translocated phosphatidylserine (PS) on the cell surface 24 hours  
309 post-infection (**Fig 3**). Despite the basal annexin V staining (CD4<sup>+</sup> mean 6.24%,  
310 CD8<sup>+</sup> mean 12.36%) seen in non-infected cells (**Fig 3A**), strong staining was  
311 observed both in live T CD4<sup>+</sup> (70.88%, p=0.0001) and CD8<sup>+</sup> lymphocytes  
312 (39.72%, p=0.0009) (**Fig 3B**). When cells were analyzed independently of  
313 Live/Dead staining, differences were still significant and even increased for  
314 CD8<sup>+</sup> (59.64%, p=0.0001) (**Supplementary Fig 4**), indicating that a  
315 considerable percentage of Annexin V-positive CD8<sup>+</sup> cells were already dead.  
316 No significant differences were observed in cell death between cells infected in  
317 the presence or absence of NH<sub>4</sub>Cl during infection. These results indicated that  
318 infection of human PBMCs by SARS-2 sharply increased the expression of  
319 apoptosis markers in T lymphocytes.

320

321 **Circulating immune cells from COVID-19 patients are infected by SARS-**  
322 **CoV-2.** During April 7<sup>th</sup> to June 18<sup>th</sup>, we enrolled 22 COVID-19 patients that  
323 were admitted to the intensive care unit (ICU), presenting a moderate to severe  
324 disease. Clinical and demographic characteristics of enrolled patients are listed  
325 in Supplementary Table 1. Blood samples were collected at admission in the  
326 ICU. To check for SARS-CoV-2 infection in PBMCs from COVID patients, we  
327 analyzed PBMCs prepared from the whole blood of 22 patients and 11 healthy  
328 donors by flow cytometry (**Fig 4A**) with staining for SARS-CoV-2 antigens. Cells  
329 from COVID-19 patients showed significant expression of SARS-CoV-2  
330 antigens (7.68%±1.56 p=0.008) in comparison with cells from healthy donors  
331 (**Fig 4B**). Interestingly, not all COVID-19 patients showed expressive staining  
332 for SARS-CoV-2, and rates of SARS-CoV-2-positive cells ranged from 0.16 and  
333 33.9% (**Fig 4B**). Additionally, PMBCs from 15 COVID-19 patients were tested



334 for the SARS-CoV-2 genome by real-time RT-PCR. Viral genome was detected  
335 in 8 out of 15 PBMC samples (53.3%), with mean viral load ( $3.8 \times 10^4$  copies per  
336  $\mu\text{g}$  of RNA) (**Supplementary Table 2**). Immunophenotyping of cells from  
337 COVID-19 patients indicated that the highest proportion of SARS-CoV-2-  
338 positive cells was found in B lymphocytes ( $42.73\% \pm 4.3$ ). Although susceptible  
339 to *in vitro* infection, we were not able to find significant numbers of SARS-CoV-2  
340 positive T cells in PBMCs from COVID-19 patients by flow cytometry. Similarly  
341 to what was observed by the *in vitro* experiments, monocytes ( $\text{CD14}^+$ ) from  
342 patients were found to be positive for SARS-CoV-2 in a high percentage  
343 ( $14.19\% \pm 15.26$ ). Inflammatory monocytes ( $\text{CD14}^+\text{CCR2}^+$  and  
344  $\text{CD14}^+\text{CD16}^+\text{CCR2}^+$ ) were positive for SARS-CoV-2 antigen in rates  
345 significantly higher in comparison with healthy controls ( $18.73\% \pm 18.46$  and  
346  $14.78\% \pm 15.5$ , respectively) (**Fig 4C**). To confirm the results obtained by flow  
347 cytometry, immunofluorescence was done for SARS-CoV-2 antigens in PBMCs  
348 isolated from COVID-19 patients. Some staining of SARS-CoV-2 with variable  
349 intensity was observed in  $\text{CD19}$  and  $\text{CD14}$  cells in PBMCs from COVID-19  
350 patients, with no discernible fluorescent signal seen in PBMCs from healthy  
351 donors (**Fig 4D**). Despite what was observed by FC experiments, some IF  
352 staining was found in  $\text{CD4}$  T lymphocytes, and after extensively screening, very  
353 few T  $\text{CD8}$  cells were found to be positive for IF (**Supplementary Fig 5**).

354 Since the detection of SARS-CoV-2 in patients was found to be variable  
355 (Figure 4C), we selected 15 COVID cases to analyze individual differences in  
356 rates of SARS-CoV-2-positive cells. Patients were stratified based on the time  
357 of sample collection after symptoms onset, and SARS-CoV-2-positive cell  
358 frequencies were plotted on a heatmap for all cell immunophenotypes analyzed  
359 (**Fig 4E**). It became clear that rates of SARS-CoV-2-positive B lymphocytes  
360 were high throughout the entire dataset. In contrast, rates of SARS-CoV-2-  
361 positive monocytes were higher after following time progression after symptoms  
362 onset (**Fig 4E**). Frequencies of SARS-CoV-2-positive cells correlated positively  
363 with the length of time of COVID-19 progression after symptoms onset,  
364 especially for inflammatory  $\text{CD14}^+\text{CCR2}^+$  monocytes ( $r=0.442$   $p=0.044$ ) (**Fig**  
365 **4F**).

366 To confirm whether SARS-CoV-2 was actively replicating in PBMCs from  
367 COVID-19 patients, we analyzed the presence of dsRNA in SARS-CoV-2-

368 positive cells of different immunophenotypes by immunofluorescence and  
369 confocal microscopy. Remarkably, dsRNA staining was found in most SARS-  
370 CoV-2-positive cell subsets, CD4<sup>+</sup> T lymphocytes, B lymphocytes, and  
371 monocytes (**Fig 5**). Altogether, these data confirm that SARS-CoV-2 infects  
372 circulating white blood cells from COVID-19 patients, and the frequencies of  
373 SARS-CoV-2-positive monocytes in the peripheral blood increase with time of  
374 onset of symptoms.

375

376 **Infected inflammatory monocytes are detected post mortem in lung**  
377 **tissues from COVID-19 patients.** The respiratory tract is the classical entry  
378 route of coronaviruses in mammalian hosts. Therefore, we checked if the same  
379 infected cell immunophenotypes found in PBMCs could also be found by  
380 immunohistochemistry in the lungs of COVID-19 patients obtained *post mortem*.  
381 Post mortem lung specimens from COVID-19 patients revealed abundant  
382 staining for SARS-CoV-2, especially throughout the entire bronchovascular  
383 axes and alveolar-capillary barriers. Control lung specimens showed no staining  
384 (**Supplementary Fig 6**). Upon staining for SARS-CoV-2, slides were scanned,  
385 the staining was erased, and re-stained sequentially for the surface antigens  
386 CD4, CD20, and CD14. The serial immunolabelling indicated that CD4<sup>+</sup>T  
387 lymphocytes, B lymphocytes, and monocytes express SARS-CoV-2 antigens  
388 (**Fig 6**) in the lungs of COVID-19 cases. Additionally, due to its well-known role  
389 in lung tissue damage in COVID-19, IL-6-positive cells were also searched for  
390 and, interestingly, several CD14<sup>+</sup> monocytes expressing IL-6 were also positive  
391 for SARS-CoV-2 (**Fig 6C-E**), indicating that inflammatory monocytes in lungs of  
392 COVID-19 patients can also be infected with SARS-CoV-2.

393

## 394 **Discussion**

395

396 It has been well accepted that several SARS-CoV-2 strategies to escape  
397 innate immune sensing, coupled with dysregulation of immune responses in  
398 early phases of infection, drive a cytokine storm that is a hallmark of severe  
399 COVID-19 [13–15]. Importantly, lymphopenia has also been recognized as a  
400 feature of severe infection by SARS-CoV-2. Postmortem examination of

401 spleens and lymph nodes showed the presence of SARS-CoV-2 in those  
402 organs, infecting ACE2-expressing macrophages and causing important tissue  
403 damage [10].

404 SARS-CoV-2 detection in tissues far from the entry sites in the  
405 respiratory tract, without exuberant viremia, suggests that SARS-CoV-2 may  
406 reach target organs by alternative ways. One possibility could be the infection of  
407 leukocytes that could serve as "Trojan horses" transporting the virus to  
408 secondary infection sites. In that regard, we have recently reported that SARS-  
409 CoV-2 infects neutrophils, which could also act as Trojan horses carrying  
410 SARS-CoV-2 to neutrophil infiltrated tissues [16]. However, until now, it has  
411 been unclear whether SARS-CoV-2 infects PBMCs *in vivo*, thus creating a  
412 possibility of them being Trojan horses of viral dissemination. To address this  
413 question, we first infected PBMCs from healthy donors *in vitro* with SARS-CoV-  
414 2, as a preliminary way to check for their susceptibility and permissiveness to  
415 the virus. Virus production in PBMCs peaked at 12 hpi, reaching titers 100-fold  
416 the initial input, with steady decay thereafter until 48 hpi. The presence of  
417 dsRNA in SARS-CoV-2 infected PBMCs in the first few hours after infection  
418 provides further evidence that the virus replicates, yet modestly, in PBMCs *in*  
419 *vitro*. These results are in keeping with reports of SARS-CoV infection of human  
420 PBMCs [17]. Moreover, the treatment of PBMCs with ammonium chloride,  
421 which elevates the pH and prevents organelle acidification, significantly reduced  
422 but did not abrogate SARS-CoV-2 replication, consistent with an alternative  
423 acidification-independent pathway.

424 The immunophenotyping of PBMCs infected *in vitro* with SARS-CoV-2  
425 revealed that CD14<sup>+</sup>, CD4<sup>+</sup>, CD8<sup>+</sup> and CD19<sup>+</sup> cells were susceptible. Primary  
426 human monocytes have been reported as susceptible to MERS-CoV and, more  
427 recently, to SARS-CoV-2 [18, 19]. In contrast, another recent study did not  
428 report PBMC infection by SARS-CoV-2 *in vitro*, possibly due to the low MOI  
429 used [20], coupled with the reported reduced expression of ACE2 by  
430 lymphocytes [21]. However, there is a recent report indicating that SARS-CoV-2  
431 spike protein interacts with surface CD147, which could be an alternative virus  
432 receptor, in a way similar to what was observed for SARS-CoV [7, 22]. The  
433 transmembrane glycoprotein CD147, also known as Basignin, is expressed in

434 some subsets of T lymphocytes [23], and thus could play a role in SARS-CoV-2  
435 entry in these cells as well.

436 An intense T cell depletion in peripheral blood is seen in up to 85% of  
437 severe COVID-19 patients [2, 24]. Furthermore, T cells from COVID-19 patients  
438 show considerable levels of exhaustion markers [3, 4], and transcriptome  
439 analysis of their PBMCs indicated upregulation of genes involved in apoptosis  
440 and p53-signalling pathways [5]. These data suggests that SARS-CoV-2  
441 infection could induce cell death by apoptosis in PBMCs, what could also  
442 happen in inflamed secondarily infected organs of COVID-19 patients. Of note,  
443 lymphopenia was also described in Middle East Respiratory Syndrome (MERS)  
444 patients, in whom MERS-CoV can directly infect human primary T lymphocytes  
445 and induce T-cell apoptosis through extrinsic and intrinsic pathways [18].

446 Annexin V staining showed that SARS-CoV-2 infection of PBMCs caused  
447 increased translocation of phosphatidylserine (PS) to the cell surface of both  
448 CD4<sup>+</sup> and CD8<sup>+</sup> T lymphocytes. The translocation of PS and subsequent  
449 scrambling of lipid membrane asymmetry is indicative of late-stage apoptosis  
450 [25]. Importantly, in the presence of NH<sub>4</sub>Cl, SARS-CoV-2 infection significantly  
451 increased annexin V labelling, suggesting that even at reduced levels of  
452 replication, SARS-CoV-2 can trigger apoptosis in lymphocytes. Taken together,  
453 the data indicate that SARS-CoV-2 infection of lymphocytes causes cell death,  
454 which may concur to the observed lymphopenia. The association of  
455 lymphopenia with poor prognosis may be related to the death of specific T-cell  
456 subsets, which may result in loss of immune response regulatory components,  
457 and drive a cytokine storm that can crosstalk with neutrophil NETosis [26]. Also,  
458 it can be related to increased IL-6 and Fas-FasL interactions [10], resulting in  
459 severe lymphoid tissue alterations [27].

460 In addition to *in vitro* infection, SARS-CoV-2 was also detected in PBMCs  
461 from COVID-19 patients, more prominently in B lymphocytes and  
462 subpopulations of monocytes. The predominance of B lymphocytes as target  
463 cells of SARS-CoV-2 infection *in vivo*, in contrast to what was seen in PBMCs  
464 infected *in vitro*, suggests that the susceptibility of different lymphocyte subsets  
465 in natural SARS-CoV-2 infection may depend on ACE2-independent alternative  
466 virus entry mechanisms. These findings corroborate a previous observation that  
467 SARS-CoV entry in B lymphocytes via a FcγRII-dependent pathway is

468 facilitated by the presence of antibodies [28]. The present results were  
469 obtained based on one-time sampling of patients who were enrolled at different  
470 times of COVID-19 evolution, what may explain the heterogeneity in rates of  
471 SARS-CoV-2-positive cells of different immunophenotypes observed among  
472 them. Accordingly, SARS-CoV-2 RNA was not detected in PBMCs from all, but  
473 in 53% of patients, indicating that SARS-CoV-2 infection in PBMCs may be  
474 variable, depending on host factors still unidentified, or present only in later  
475 phases of COVID-19, as suggested by the positive correlation between time  
476 from symptoms onset and frequency of SARS-CoV-2 positive cells in PBMCs. A  
477 possible explanation for an increase in SARS-CoV-2 susceptible cells over time  
478 could be an increase in ACE2 expression, triggered by type I IFN [29]. In this  
479 context, it is noteworthy that the replication of SARS-CoV in PBMCs was not  
480 sustained for long periods [17, 30].

481 To the best of our knowledge, this is the first report of circulating  
482 lymphoid cells positive for SARS-CoV-2, and the presence of dsRNA indicates  
483 that these cells are targets of virus replication. This may considerably impact  
484 the cells immune competence during COVID-19 and may help cell-associated  
485 SARS-CoV-2 spread to secondary infection sites.

486 SARS-CoV-2 recruits important inflammatory infiltrate in the lungs,  
487 containing diverse immune cell types that bear close contact with SARS-CoV-2-  
488 infected lung cells, such as pneumocytes and alveolar macrophages [31]. In the  
489 present study, we found CD4<sup>+</sup> T and B lymphocytes and, importantly, also IL-6-  
490 expressing inflammatory monocytes positive for SARS-CoV-2 infiltrating the  
491 lung tissue from fatal cases of COVID-19. Further studies will be required to  
492 clarify whether SARS-CoV-2-positive lympho-mononuclear cells become  
493 infected in the lung or enter the affected tissue from the bloodstream already  
494 containing the virus. Regardless of where the immune cells become infected by  
495 SARS-CoV-2, their presence in the peripheral blood can impact directly on virus  
496 dissemination, delivering the infectious virus to secondary sites of infection.

497 Inflammatory monocytes play a significant role in the immunopathology  
498 of COVID-19 [13, 14] and ICU patients have high levels of circulating  
499 CD14<sup>+</sup>CD16<sup>+</sup> inflammatory monocytes, which correlates with unfavorable  
500 outcomes [32, 33]. Increased expression of CCR2 and other inflammatory  
501 markers by monocytes leads to the infiltration of tissues with high expression of

502 the correspondent CCL2 chemokine [13]. Interestingly, inflammatory monocytes  
503 with the same profile were found abundantly in bronchoalveolar lavage fluids  
504 from patients with severe COVID-19 [34]. Based on that, our data suggest that  
505 CD14+CCR2+ and CD14+CD16+CCR2+ infected monocytes could act as  
506 Trojan horses and traffic viruses to secondary sites of infection, where SARS-  
507 CoV-2 causes severe tissue damage. Additional lymphoid cell recruitment to  
508 damaged tissues may further contribute to lymphopenia [9].

509 Overall, the infection of lymphomononuclear cells by SARS-CoV-2 in  
510 peripheral blood from patients with COVID-19 has important consequences for  
511 pathogenesis of this multifaceted disease, including possible compromises of  
512 immune cell functions, and helping the virus to reach immune-privileged  
513 secondary sites of infection.

514

#### 515 **Conflict of interests**

516 The authors declare none.

517

#### 518 **Acknowledgements**

519 This study was supported by the Brazilian National Research Council  
520 (CNPq grant numbers 310100/2017-8 and 403201/2020-9) and the Sao Paulo  
521 State Research Foundation (FAPESP grant numbers 2013/16349-2 and  
522 2014/02438-6). The authors also thank Dimensions Sciences, a Non-Profit  
523 Organization that granted Dr. Castro a research scholarship while this study was  
524 conducted.

525

526

527

528



529

## References

530

- 531 [1] Zhou, P.; Yang, X. Lou; Wang, X. G.; Hu, B.; Zhang, L.; Zhang, W.; Si, H. R.; Zhu, Y.; Li,  
532 B.; Huang, C. L.; et al. A Pneumonia Outbreak Associated with a New Coronavirus of  
533 Probable Bat Origin. *Nature*, **2020**, 579 (7798), 270–273. [https://doi.org/10.1038/s41586-](https://doi.org/10.1038/s41586-020-2012-7)  
534 020-2012-7.
- 535 [2] Huang, C.; Wang, Y.; Li, X.; Ren, L.; Zhao, J.; Hu, Y.; Zhang, L.; Fan, G.; Xu, J.; Gu, X.;  
536 et al. Clinical Features of Patients Infected with 2019 Novel Coronavirus in Wuhan,  
537 China. *Lancet*, **2020**, 395 (10223), 497–506. [https://doi.org/10.1016/S0140-](https://doi.org/10.1016/S0140-6736(20)30183-5)  
538 6736(20)30183-5.
- 539 [3] Diao, B.; Wang, C.; Tan, Y.; Chen, X.; Liu, Y.; Ning, L.; Chen, L.; Li, M.; Liu, Y.; Wang,  
540 G.; et al. Reduction and Functional Exhaustion of T Cells in Patients With Coronavirus  
541 Disease 2019 (COVID-19). *Front. Immunol.*, **2020**, 11 (May), 1–7.  
542 <https://doi.org/10.3389/fimmu.2020.00827>.
- 543 [4] Zheng, H. Y.; Zhang, M.; Yang, C. X.; Zhang, N.; Wang, X. C.; Yang, X. P.; Dong, X. Q.;  
544 Zheng, Y. T. Elevated Exhaustion Levels and Reduced Functional Diversity of T Cells in  
545 Peripheral Blood May Predict Severe Progression in COVID-19 Patients. *Cell. Mol.*  
546 *Immunol.*, **2020**, 17 (5), 541–543. <https://doi.org/10.1038/s41423-020-0401-3>.
- 547 [5] Xiong, Y.; Liu, Y.; Cao, L.; Wang, D.; Guo, M.; Jiang, A.; Guo, D.; Hu, W.; Yang, J.;  
548 Tang, Z.; et al. Transcriptomic Characteristics of Bronchoalveolar Lavage Fluid and  
549 Peripheral Blood Mononuclear Cells in COVID-19 Patients. *Emerg. Microbes Infect.*,  
550 **2020**, 9 (1), 761–770. <https://doi.org/10.1080/22221751.2020.1747363>.
- 551 [6] Hoffmann, M.; Kleine-Weber, H.; Schroeder, S.; Kruger, N.; Herrler, T.; Erichsen, S.;  
552 Schiergens, T. S.; Wu, N.-H.; Nitsche, A.; Muller, M. A.; et al. SARS-CoV-2 Cell Entry  
553 Depends on ACE2 and TMPRSS2 and Is Blocked by a Clinically Proven Protease  
554 Inhibitor. *Cell*, **2020**, 181 (16), 1–9.
- 555 [7] Wang, K.; Chen, W.; Chen, Z.-N. SARS-CoV-2 Invades Host Cells via a Novel Route:  
556 CD147-Spike Protein. *bioRxiv*, **2012**, 91 (5), 1–10.  
557 <https://doi.org/10.1101/2020.03.14.988345>.
- 558 [8] Zang, R.; Gomez Castro, M. F.; McCune, B. T.; Zeng, Q.; Rothlauf, P. W.; Sonnek, N.  
559 M.; Liu, Z.; Brulois, K. F.; Wang, X.; Greenberg, H. B.; et al. TMPRSS2 and TMPRSS4  
560 Promote SARS-CoV-2 Infection of Human Small Intestinal Enterocytes. *Sci. Immunol.*,  
561 **2020**, 5 (47). <https://doi.org/10.1126/sciimmunol.abc3582>.
- 562 [9] chen, yongwen; Feng, Z.; Diao, B.; Wang, R.; Wang, G.; Wang, C.; Tan, Y.; Liu, L.;  
563 Wang, C.; Liu, Y.; et al. The Novel Severe Acute Respiratory Syndrome Coronavirus 2  
564 (SARS-CoV-2) Directly Decimates Human Spleens and Lymph Nodes. *medRxiv*, **2020**,  
565 2, 2020.03.27.20045427. <https://doi.org/10.1101/2020.03.27.20045427>.
- 566 [10] Rios-Santos, F.; Alves-Filho, J. C.; Souto, F. O.; Spiller, F.; Freitas, A.; Lotufo, C. M. C.;  
567 Soares, M. B. P.; Dos Santos, R. R.; Teixeira, M. M.; Cunha, F. D. Q. Down-Regulation  
568 of CXCR2 on Neutrophils in Severe Sepsis Is Mediated by Inducible Nitric Oxide



- 569 Synthase-Derived Nitric Oxide. *Am. J. Respir. Crit. Care Med.*, **2007**, 175 (5), 490–497.  
570 <https://doi.org/10.1164/rccm.200601-103OC>.
- 571 [11] Alves-Filho, J. C.; Freitas, A.; Souto, F. O.; Spiller, F.; Paula-Neto, H.; Silva, J. S.;  
572 Gazzinelli, R. T.; Teixeira, M. M.; Ferreira, S. H.; Cunha, F. Q. Regulation of Chemokine  
573 Receptor by Toll-like Receptor 2 Is Critical to Neutrophil Migration and Resistance to  
574 Polymicrobial Sepsis. *Proc. Natl. Acad. Sci. U. S. A.*, **2009**, 106 (10), 4018–4023.  
575 <https://doi.org/10.1073/pnas.0900196106>.
- 576 [12] Glass, G.; Papin, J. A.; Mandell, J. W. SIMPLE: A Sequential Immunoperoxidase  
577 Labeling and Erasing Method. *J. Histochem. Cytochem.*, **2009**, 57 (10), 899–905.  
578 <https://doi.org/10.1369/jhc.2009.953612>.
- 579 [13] Zhou, Y.; Fu, B.; Zheng, X.; Wang, D.; Zhao, C.; Qi, Y.; Sun, R.; Tian, Z.; Xu, X.; Wei, H.  
580 Pathogenic T-Cells and Inflammatory Monocytes Incite Inflammatory Storms in Severe  
581 COVID-19 Patients. *Natl. Sci. Rev.*, **2020**, No. March, 1–5.  
582 <https://doi.org/10.1093/nsr/nwaa041>.
- 583 [14] Mehta, P.; McAuley, D. F.; Brown, M.; Sanchez, E.; Tattersall, R. S.; Manson, J. J.  
584 COVID-19: Consider Cytokine Storm Syndromes and Immunosuppression. *Lancet*,  
585 **2020**, 395 (10229), 1033–1034. [https://doi.org/10.1016/S0140-6736\(20\)30628-0](https://doi.org/10.1016/S0140-6736(20)30628-0).
- 586 [15] Vabret, N.; Britton, G. J.; Gruber, C.; Hegde, S.; Kim, J.; Kuksin, M.; Levantovsky, R.;  
587 Malle, L.; Moreira, A.; Park, M. D.; et al. Immunology of COVID-19: Current State of the  
588 Science. *Immunity*, **2020**, 1. <https://doi.org/10.1016/j.immuni.2020.05.002>.
- 589 [16] Veras, F.; Pontelli, M. C.; Cunha, F. SARS-CoV-2 Triggered Neutrophil Extracellular  
590 Traps (NETs) Mediate COVID-19 Pathology. *medRxiv*, **2020**.
- 591 [17] Li, L.; Wo, J.; Shao, J.; Zhu, H.; Wu, N.; Li, M.; Yao, H.; Hu, M.; Dennin, R. H. SARS-  
592 Coronavirus Replicates in Mononuclear Cells of Peripheral Blood (PBMCs) from SARS  
593 Patients. *J. Clin. Virol.*, **2003**, 28 (3), 239–244. [https://doi.org/10.1016/S1386-](https://doi.org/10.1016/S1386-6532(03)00195-1)  
594 [6532\(03\)00195-1](https://doi.org/10.1016/S1386-6532(03)00195-1).
- 595 [18] Chu, H.; Zhou, J.; Wong, B. H. Y.; Li, C.; Chan, J. F. W.; Cheng, Z. S.; Yang, D.; Wang,  
596 D.; Lee, A. C. Y.; Li, C.; et al. Middle East Respiratory Syndrome Coronavirus Efficiently  
597 Infects Human Primary T Lymphocytes and Activates the Extrinsic and Intrinsic  
598 Apoptosis Pathways. *J. Infect. Dis.*, **2016**, 213 (6), 904–914.  
599 <https://doi.org/10.1093/infdis/jiv380>.
- 600 [19] Codo, A. C.; Davanzo, G. G.; Monteiro, L. D. B.; Souza, G. F. De; Muraro, S. P.;  
601 Carregari, V. C.; Alberto, C.; Biagi, O. De; Crunfli, F.; Jimenez, J. L.; et al. Elevated  
602 Glucose Levels Favor SARS-CoV-2 Infection and Monocyte Response through a HIF-  
603 1 $\alpha$ /Glycolysis Dependent Axis.
- 604 [20] Banerjee, A.; Nasir, J. A.; Budyłowski, P.; Yip, L.; Aftanas, P.; Christie, N.; Ghalami, A.;  
605 Baid, K.; Raphenya, A. R.; Hirota, J. A.; et al. Isolation, Sequence, Infectivity, and  
606 Replication Kinetics of Severe Acute Respiratory Syndrome Coronavirus 2. *Emerg.*  
607 *Infect. Dis.*, **2020**, 26 (9). <https://doi.org/10.3201/eid2609.201495>.
- 608 [21] Uhlén, M.; Fagerberg, L.; Hallström, B. M.; Lindskog, C.; Oksvold, P.; Mardinoglu, A.;

- 609 Sivertsson, Å.; Kampf, C.; Sjöstedt, E.; Asplund, A.; et al. Tissue-Based Map of the  
610 Human Proteome. *Science* (80-. ), **2015**, *347* (6220).  
611 <https://doi.org/10.1126/science.1260419>.
- 612 [22] Chen, Z.; Mi, L.; Xu, J.; Yu, J.; Wang, X.; Jiang, J.; Xing, J.; Shang, P.; Qian, A.; Li, Y.; et  
613 al. Function of HAb18G/CD147 in Invasion of Host Cells by Severe Acute Respiratory  
614 Syndrome Coronavirus. *J. Infect. Dis.*, **2005**, *191* (5), 755–760.  
615 <https://doi.org/10.1086/427811>.
- 616 [23] Solstad, T.; Bains, S. J.; Landskron, J.; Aandahl, E. M.; Thiede, B.; Taskén, K.;  
617 Torgersen, K. M. CD147 (Basigin/Emmprin) Identifies FoxP3 +CD45RO +CTLA4 +  
618 Activated Human Regulatory T Cells. *Blood*, **2011**, *118* (19), 5141–5151.  
619 <https://doi.org/10.1182/blood-2011-02-339242>.
- 620 [24] Chen, N.; Zhou, M.; Dong, X.; Qu, J.; Gong, F.; Han, Y.; Qiu, Y.; Wang, J.; Liu, Y.; Wei,  
621 Y.; et al. Epidemiological and Clinical Characteristics of 99 Cases of 2019 Novel  
622 Coronavirus Pneumonia in Wuhan, China: A Descriptive Study. *Lancet*, **2020**, *395*  
623 (10223), 507–513. [https://doi.org/10.1016/S0140-6736\(20\)30211-7](https://doi.org/10.1016/S0140-6736(20)30211-7).
- 624 [25] Suzuki, J.; Denning, D. P.; Imanishi, E.; Horvitz, H. R.; Nagata, S. Xk-Related Protein 8  
625 and CED-8 Promote Phosphatidylserine Exposure in Apoptotic Cells. *Science* (80-. ),  
626 **2013**, *341* (6144), 403–406. <https://doi.org/10.1126/science.1236758>.
- 627 [26] Barnes, B. J.; Adrover, J. M.; Baxter-Stoltzfus, A.; Borczuk, A.; Cools-Lartigue, J.;  
628 Crawford, J. M.; Daßler-Plenker, J.; Guerci, P.; Huynh, C.; Knight, J. S.; et al. Targeting  
629 Potential Drivers of COVID-19: Neutrophil Extracellular Traps. *J. Exp. Med.*, **2020**, *217*  
630 (6), 1–7. <https://doi.org/10.1084/jem.20200652>.
- 631 [27] Blanco-Melo, D.; Nilsson-Payant, B. E.; Liu, W. C.; Uhl, S.; Hoagland, D.; Møller, R.;  
632 Jordan, T. X.; Oishi, K.; Panis, M.; Sachs, D.; et al. Imbalanced Host Response to  
633 SARS-CoV-2 Drives Development of COVID-19. *Cell*, **2020**, *181* (5), 1036-1045.e9.  
634 <https://doi.org/10.1016/j.cell.2020.04.026>.
- 635 [28] Kam, Y. W.; Kien, F.; Roberts, A.; Cheung, Y. C.; Lamirande, E. W.; Vogel, L.; Chu, S.  
636 L.; Tse, J.; Guarner, J.; Zaki, S. R.; et al. Antibodies against Trimeric S Glycoprotein  
637 Protect Hamsters against SARS-CoV Challenge despite Their Capacity to Mediate  
638 FcγRII-Dependent Entry into B Cells in Vitro. *Vaccine*, **2007**, *25* (4), 729–740.  
639 <https://doi.org/10.1016/j.vaccine.2006.08.011>.
- 640 [29] Ziegler, C. G. K.; Allon, S. J.; Nyquist, S. K.; Mbanjo, I. M.; Miao, V. N.; Tzouanas, C. N.;  
641 Cao, Y.; Yousif, A. S.; Bals, J.; Hauser, B. M.; et al. SARS-CoV-2 Receptor ACE2 Is an  
642 Interferon-Stimulated Gene in Human Airway Epithelial Cells and Is Detected in Specific  
643 Cell Subsets across Tissues. *Cell*, **2020**, 1016–1035.  
644 <https://doi.org/10.1016/j.cell.2020.04.035>.
- 645 [30] Yilla, M.; Harcourt, B. H.; Hickman, C. J.; McGrew, M.; Tamin, A.; Goldsmith, C. S.;  
646 Bellini, W. J.; Anderson, L. J. SARS-Coronavirus Replication in Human Peripheral  
647 Monocytes/Macrophages. *Virus Res.*, **2005**, *107* (1), 93–101.  
648 <https://doi.org/10.1016/j.virusres.2004.09.004>.

- 649 [31] Roosecelis B. Martines; Ritter, J. M.; Matkovic, E.; Gary, J.; Bollweg, B. C.; Bullock, H.;  
650 Goldsmith, C. S.; Silva-Flannery, L.; Seixas, J. N.; Reagan-Steiner, S.; et al. Pathology  
651 and Pathogenesis of SARS-CoV-2 Associated with Fatal Coronavirus Disease, United  
652 States. *Emerg. Infect. Dis.*, **2020**, 26. <https://doi.org/10.3201/eid2609.202095>.
- 653 [32] Zhang, D.; Guo, R.; Lei, L.; Liu, H.; Wang, Y.; Wang, Y.; Dai, T.; Zhang, T.; Lai, Y.;  
654 Wang, J.; et al. COVID-19 Infection Induces Readily Detectable Morphological and  
655 Inflammation-Related Phenotypic Changes in Peripheral Blood Monocytes, the Severity  
656 of Which Correlate with Patient Outcome. *medRxiv*, **2020**, 2020.03.24.20042655.  
657 <https://doi.org/10.1101/2020.03.24.20042655>.
- 658 [33] Zhou, Y.; Fu, B.; Zheng, X.; Wang, D.; Zhao, C. In Severe Pulmonary Syndrome  
659 Patients of a New Coronavirus. **2020**.
- 660 [34] Liao, M.; Liu, Y.; Yuan, J.; Wen, Y.; Xu, G.; Zhao, J.; Cheng, L.; Li, J.; Wang, X.; Wang,  
661 F.; et al. Single-Cell Landscape of Bronchoalveolar Immune Cells in Patients with  
662 COVID-19. *Nat. Med.*, **2020**, 26 (6), 842–844. [https://doi.org/10.1038/s41591-020-0901-](https://doi.org/10.1038/s41591-020-0901-9)  
663 9.  
664  
665

666 **Figure legends**

667

668 **Figure 1. Human primary blood cells are susceptible and permissive to**  
669 **SARS-CoV-2.** Blood from five healthy donors was collected and PBMCs were  
670 separated by Ficoll density gradient. Cells were infected with SARS-CoV-2  
671 Brazil/SPBR-02/2020 (MOI-1) and cultured for 48 h. (A) Overtime virus progeny  
672 production from PBMCs infected with SARS-CoV-2. Supernatants from cultured  
673 PBMCs were collected at each time point and titrated by TCID<sub>50</sub>. The small  
674 symbols represent individual values (5 healthy donors) and error bars depict  
675 standard deviation. (B) SARS-CoV-2 progeny titers in supernatants of infected  
676 PBMCs at 24h and 48 h post infection, with and without treatment with 20mM  
677 NH<sub>4</sub>Cl. (C) Immunostaining for dsRNA in PBMCs cultured on poly-lysine –  
678 coated coverslips 6h after SARS-CoV-2 infection. Cells were fixed,  
679 immunostained for SARS-CoV-2 (red), dsRNA (cyan) and analyzed by confocal  
680 microscopy. Statistical analysis was performed using two-way ANOVA and  
681 Holm-Sidak post-test. Magnification: 63x. Scale bars 10 μM.

682

683 **Figure 2. SARS-CoV-2 differentially infects subsets of human PBMCs in**  
684 **vitro.** (A) Representative flow cytometry plots of PBMCs infected with SARS-  
685 CoV-2 (24 hpi) in the presence or absence of 20mM NH<sub>4</sub>Cl with gating in live  
686 CD14<sup>+</sup>, CD4<sup>+</sup>, CD8<sup>+</sup> or CD19<sup>+</sup> cells. Representative histograms of the  
687 fluorescence for each condition in comparison with the proper controls. The  
688 gray-shaded curve indicates secondary antibody Alexa488 signal background,  
689 while the dashed curve indicates the background signal in mock-infected cells.  
690 The light- and dark-colored curves indicate respectively cells infected in the  
691 presence and absence of NH<sub>4</sub>Cl. Percentages of SARS-CoV-2-infected  
692 monocytes (B) and lymphocytes (C), showing the average mean fluorescent  
693 intensity (MFI) in the panels on the right and the frequency (%) of SARS-CoV-2-  
694 infected cells in the panels on the left. Mean ± s.d. is indicated on the bar  
695 graphs. Significance was determined by one-way ANOVA with Bonferroni's  
696 post-test.

697

698 **Figure 3. SARS-CoV-2 infection of PBMCs increases expression of**  
699 **phosphatidylserine (PS) in T lymphocytes.** (A) Representative flow

700 cytometry plots of live CD4<sup>+</sup> and CD8<sup>+</sup> T cells positive for Annexin V staining in  
701 PBMCs from five healthy donors 24h after infection with SARS-CoV-2 (MOI= 1).  
702 (B) Percentages of live lymphocytes positive for Annexin V and expressing PS  
703 in the cell surface after SARS-CoV-2 *in vitro* infection. Mean  $\pm$  s.d. is indicated  
704 for all bar graphs. Significance was determined by one-way ANOVA and  
705 Bonferroni's post-test.

706

707 **Figure 4: Detection of SARS-CoV-2 in PBMCs from hospitalized COVID-19**

708 **patients.** (A) Schematic representation of samples used in each experiment  
709 and comparisons. (B) (Left) Representative flow cytometry plots indicating  
710 SARS-CoV-2 positivity of PBMCs from COVID-19 patients in comparison with  
711 isotype control and healthy donors. (Right) Percentages of SARS-CoV-2-  
712 infected cells from COVID-19 patients (n=22) and healthy donors (n=12).  
713 Results were compared by unpaired *t*-test (p=0.008). (C) Percentages of SARS-  
714 CoV-2-infected cells considering the different immunophenotypes, in COVID-19  
715 patients (n=22). (D) Immunofluorescence of PBMCs from COVID-19 patients  
716 labeling for SARS-CoV-2 (red), nuclei (blue) and immunophenotypes CD4,  
717 CD19 or CD14 (green). Scale bars: 50  $\mu$ M (E) Heat-map indicating SARS-CoV-  
718 2-positive cell frequencies for each immunophenotype, stratified by time from  
719 symptoms onset (Patient number/days after symptoms onset). Data was plotted  
720 individually for each COVID-19 patient analyzed. (F) Correlation and linear  
721 regression analysis between time after symptoms onset and frequencies of  
722 SARS-CoV-2-positive cells. Both 'p' and 'r' values are indicated in the graphs.  
723 The best-fit line is displayed in red, while the light-red area represents the  
724 confidence interval. P values <0.05 were considered significant.

725

726 **Figure 5. Peripheral blood cells naturally infected by SARS-CoV-2 from**  
727 **COVID-19 patients presents double-stranded RNA, a replication**

728 **intermediate.** PBMC from (A) healthy donors or (B) COVID-19 patients were  
729 isolated and put on coverslips pre-treated with poly-lysine. Cells were fixed and  
730 stained for SARS-CoV-2 (red), immune phenotypes as CD4, CD19 or CD14  
731 (green), dsRNA (cyan) and nuclei (blue). Immunofluorescence was examined  
732 using confocal microscopy. In the bottom left corner of each channel, an inset of  
733 the labelling phenotype is shown. Representative images for each

734 immunophenotype, where at least two patients were analyzed. Magnification  
735 63x. Scale bar 10  $\mu$ m.

736

737 **Figure 6. SARS-CoV-2 is detected in diverse immune cell types in COVID-**  
738 **19 lungs.** (A, F and I) SARS-CoV-2 staining pseudocolored in green with  
739 hematoxylin counterstaining. (B, G, J) Staining for the immunophenotypes  
740 CD14, CD20 and CD4, respectively, pseudocolored in red. (D): Staining for IL-  
741 6, pseudocolored in magenta. (C, E, H and K) Overlaid layers from the previous  
742 sequential rounds of staining, with superimposed staining indicated in yellow.  
743 (c', e', h' and k') Insets from the respective previous panels. Scale bars: 50  $\mu$ M.

744

745 **Figure S1. Validation of SARS-CoV-2 detection with human convalescent**  
746 **serum.** Vero cells were infected with SARS-CoV-2 (MOI=1) or mock infected  
747 and incubated for 48h. (A) Phase-contrast microscopy of uninfected (left panel)  
748 and SARS-CoV-2-infected Vero cell monolayer showing cytopathic effect.  
749 Magnification 400 $\times$ . (B) Immunofluorescence of Vero cells infected with SARS-  
750 CoV-2 or mock-infected at 48hpi, when cells were fixed and stained for GM130  
751 (red), virus (green) and nuclei (DAPI). Scale bar 10  $\mu$ m.

752

753 **Figure S2. Flow cytometry (FC) of SARS-CoV-2-infected PBMCs from**  
754 **healthy with labeling for SARS-CoV-2.** PBMCs from healthy donors infected  
755 in vitro (MOI=1) were analyzed by FC using mouse polyclonal anti-SARS-CoV-2  
756 with and without cell permeabilization. Treatment with trypsin to remove  
757 surface-bound viral particles was used as an additional control. (A)  
758 Representative histograms of surface and intracellular staining for SARS-CoV-  
759 2, with SARS-CoV-2-infected cells in red and trypsin-treated infected cells in  
760 black. (B) Comparison of intracellular and surface staining of infected cells  
761 treated or not with trypsin, and non-infected cells in percentages on the left and  
762 MFI on the right.

763

764 **Figure S3. Gating strategies used for immunophenotyping of SARS-CoV-**  
765 **2-infected cells.** (A) Cells were initially gated to exclude doublets and to  
766 exclude dead cells, using Live/Dead APC/H7 and CD3 staining. Next, detection  
767 of SARS-CoV-2 antigens in live T lymphocytes was defined based on the  
768 background secondary antibody signal (Alexa488) and signal obtained in  
769 healthy donors (flow plots and representative histograms). The same strategy  
770 was used for CD19<sup>+</sup> B lymphocytes. (B) Live monocytes were initially gated as  
771 described for lymphocytes. Next, expression of CD14 and CD16 was used to  
772 define circulating monocyte subpopulations. Expression of CCR2 by CD14<sup>+</sup> and  
773 CD14<sup>+</sup>CD16<sup>+</sup> cells was used to define inflammatory monocytes. Among every  
774 defined subpopulation, expression of SARS-CoV-2 antigens was defined in  
775 comparison with secondary antibody background and healthy donors staining  
776 (flow plots and representative histograms).

777



778 **Figure S4. Percentage of lymphocytes expressing phosphatidylserine (PS)**  
779 **on the surface after in vitro infection with SARS-CoV-2.** Cells were analyzed  
780 independently of Live/Dead APC/H7 staining. Mean  $\pm$  s.d. is shown for all bar  
781 graphs. Significance was determined by one-way ANOVA and Bonferroni's  
782 post-test was applied.

783  
784 **Figure S5. T CD8 lymphocytes are rarely detected with SARS-CoV-2.** (A)  
785 PBMC from COVID-19 patients were put on coverslips pre-treated with poly-  
786 lysyne, fixed and stained for SARS-CoV-2 (red), CD8 (green) and nuclei (blue).  
787 Coverslips were analyzed in epifluorescence microscopy. Magnification 400x.  
788 Scale bar 20  $\mu$ m. (B) dsRNA detection in CD8 cells. PBMC was labeled as  
789 described in (a) and dsRNA (cyan) using an anti-J2 antibody. At the bottom left  
790 corner an inset is shown. Coverslips were analyzed in confocal microscopy.  
791 Magnification 63x. Scale bar 10  $\mu$ m.

792  
793 **Figure S6. Immunohistochemistry for SARS-CoV-2 antigens in *post***  
794 ***mortem* lungs from COVID-19.** (A) *Post mortem* lung fragment from a  
795 hantavirus fatal case obtained in 2016, as a negative control for SARS-CoV-2  
796 staining. (B) Staining for SARS-CoV-2 in lung from COVID-19 fatal case. (b')  
797 Individual cells showing strong cytoplasmic staining for SARS-CoV-2 antigens  
798 in detail. Scale bars: 50  $\mu$ M.

799  
800  
801



802 **Figure 1**

803

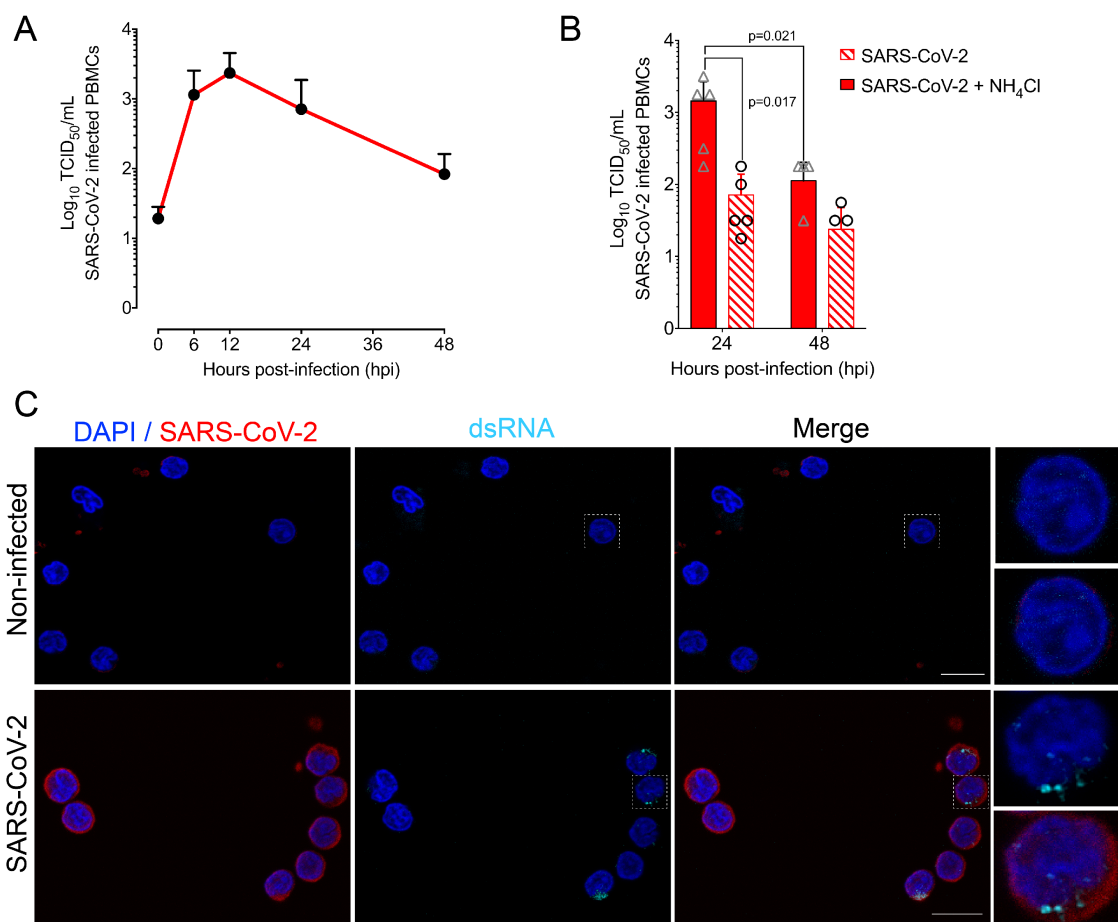

804

805

806

807 **Figure 2**

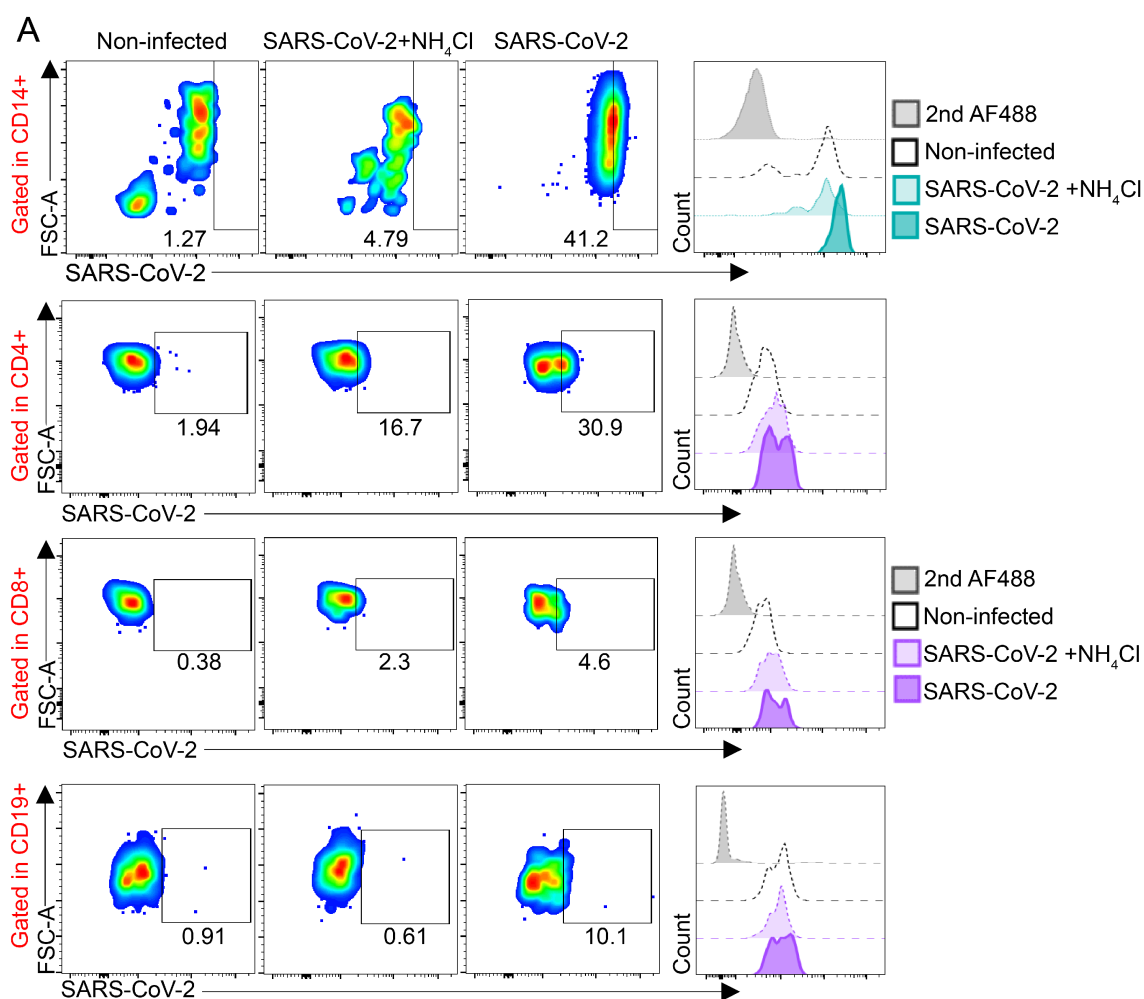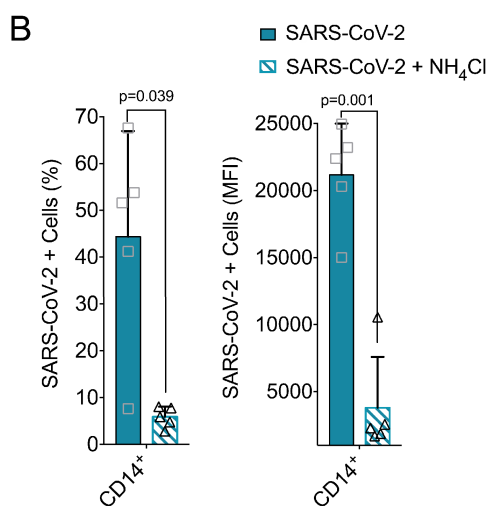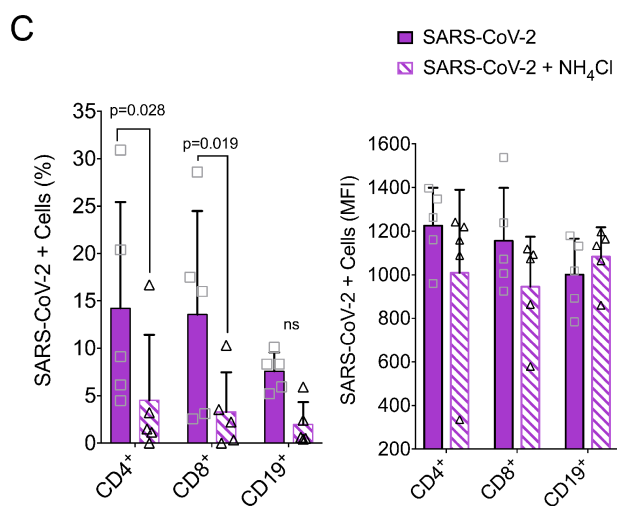

808

809

810

811 **Figure 3**

812

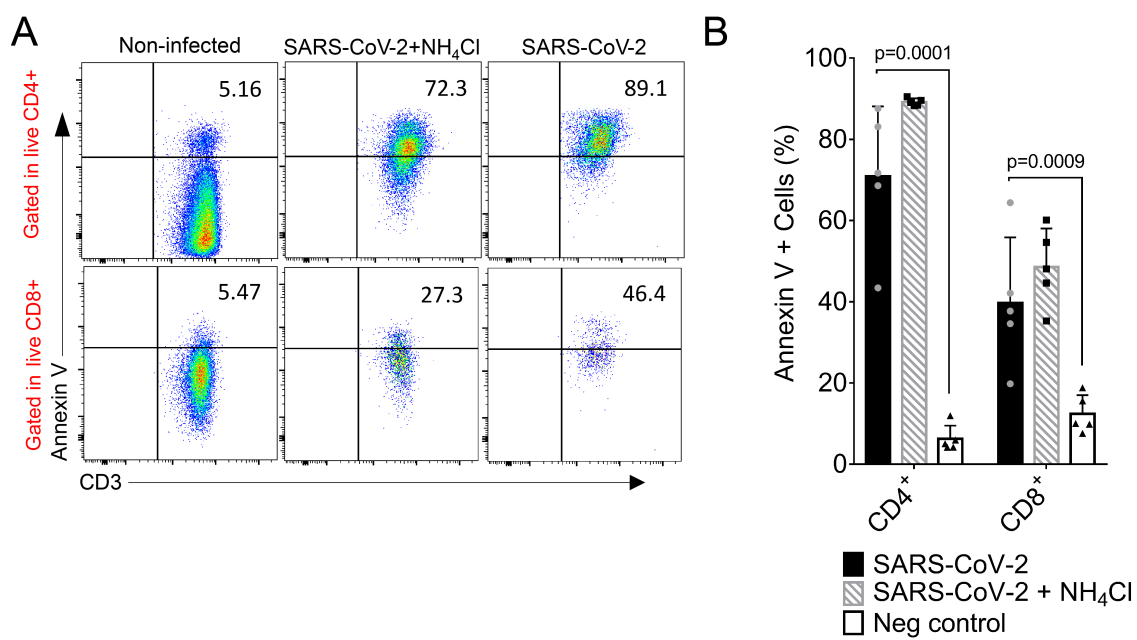

813

814

815

816 **Figure 4**

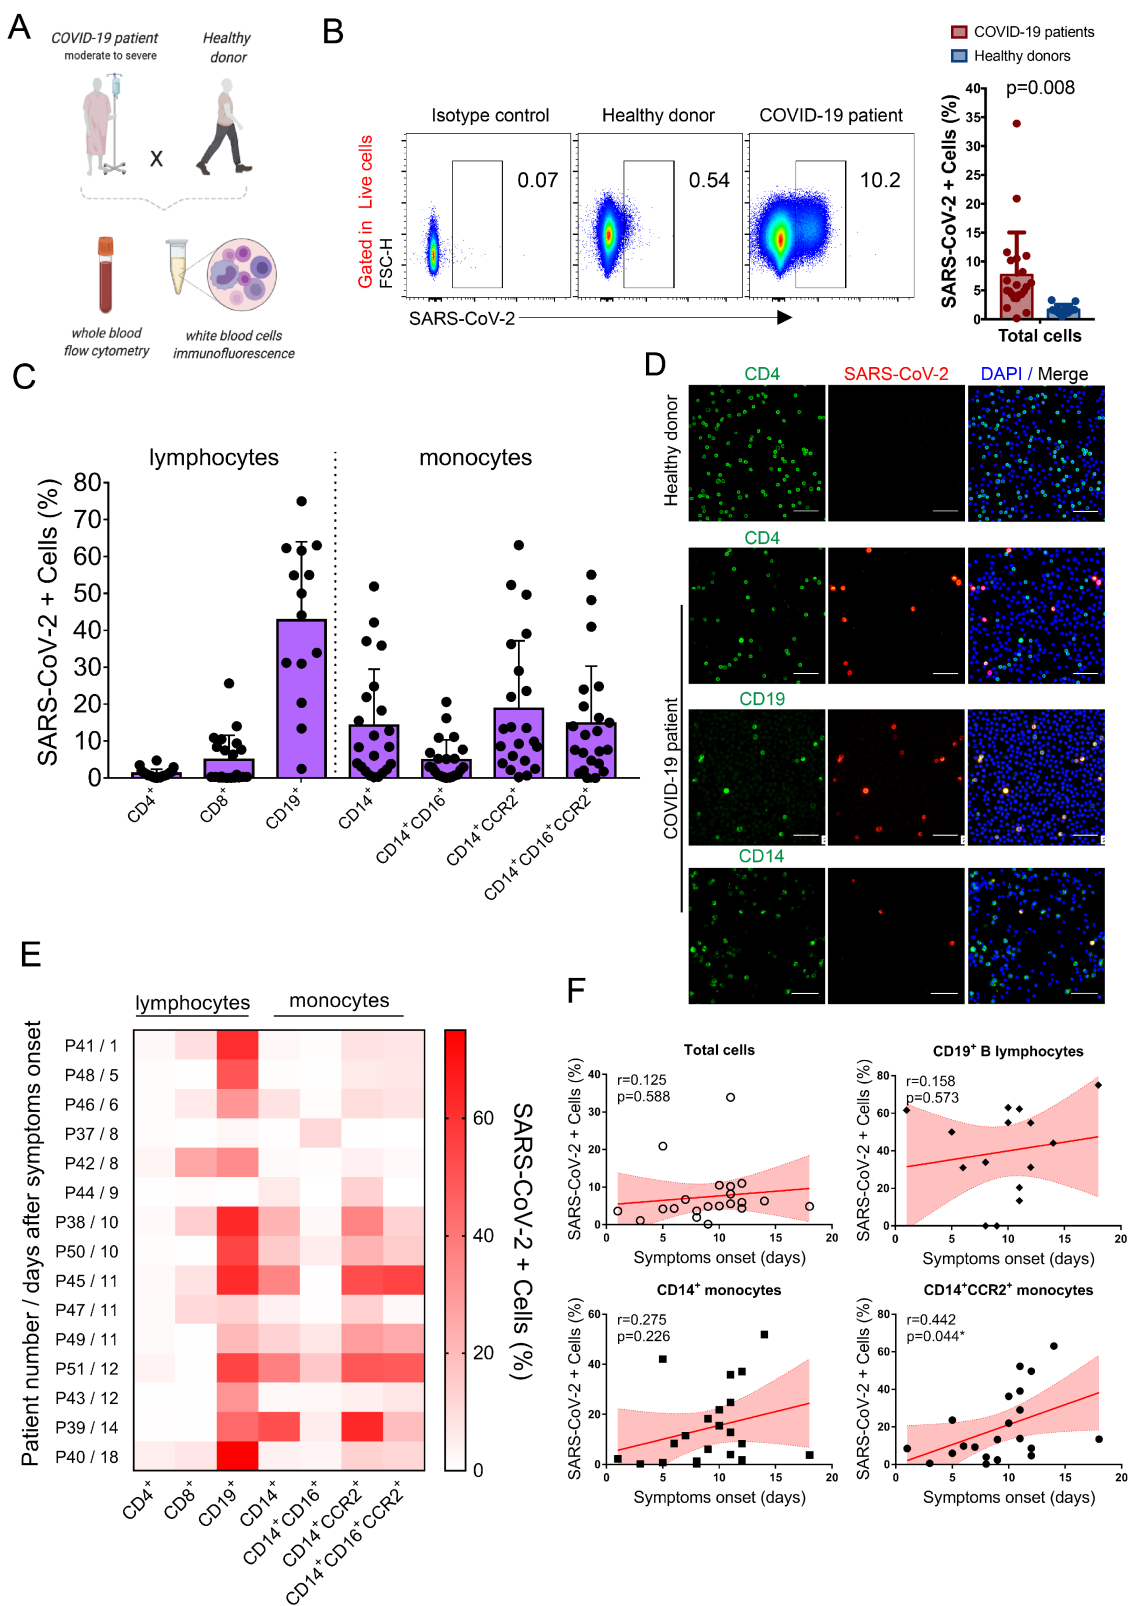

817

818

819 **Figure 5**

820

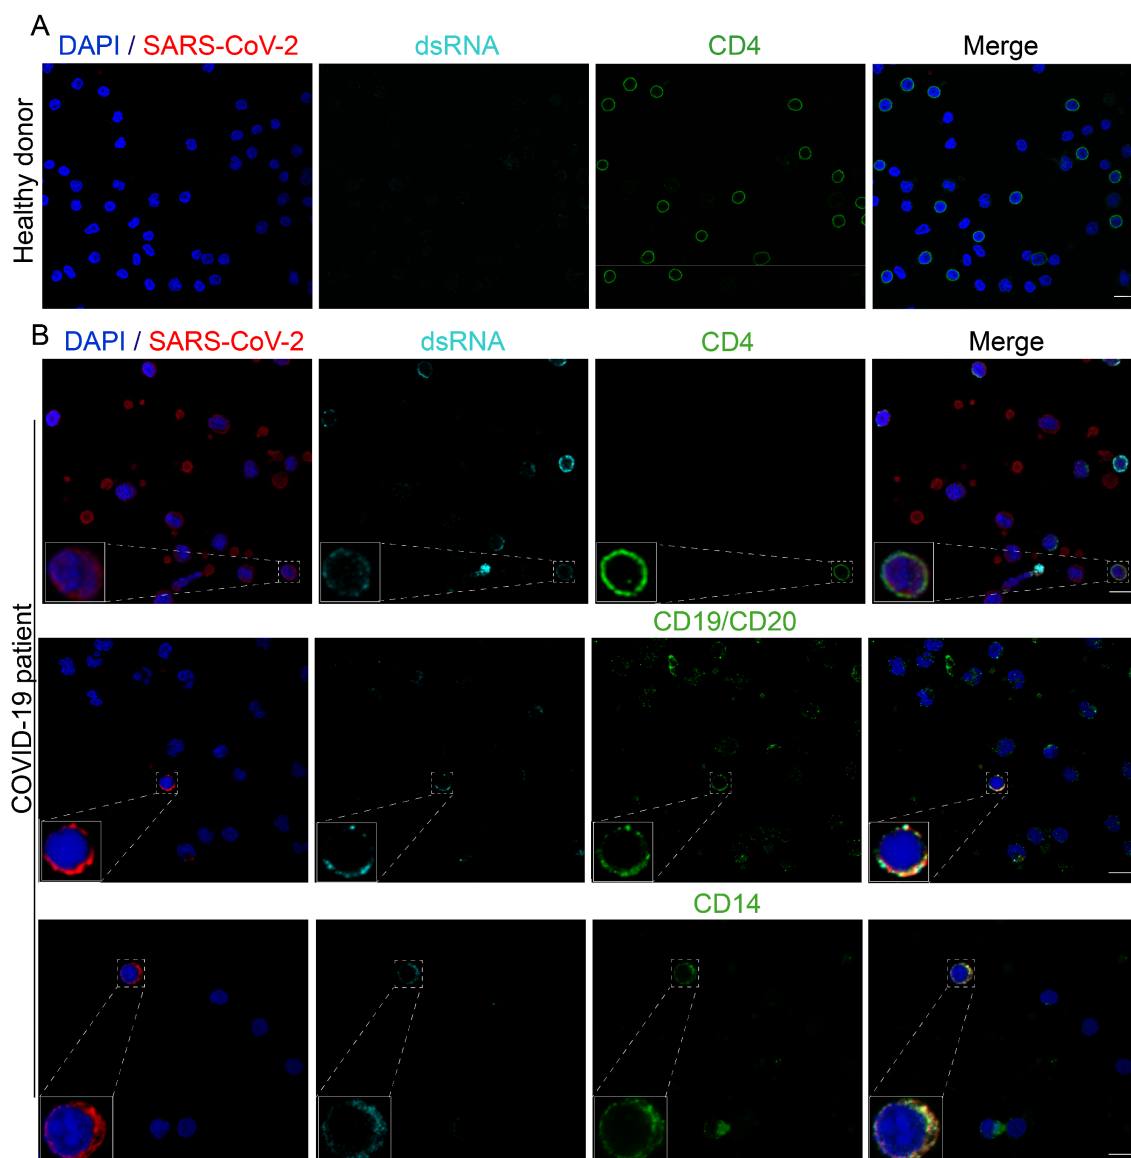

821

822

823 **Figure 6**

824

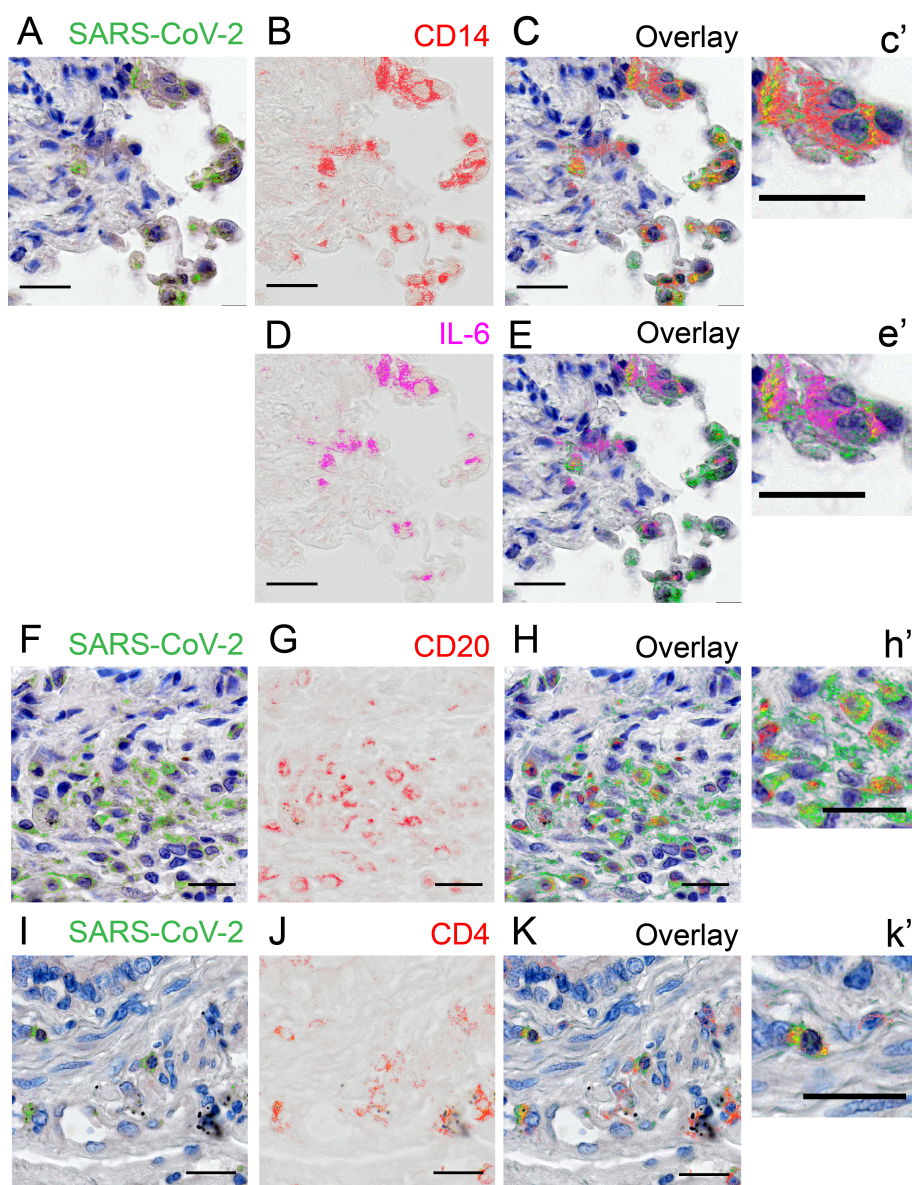

825

826

827



828 **Figure S1**

829

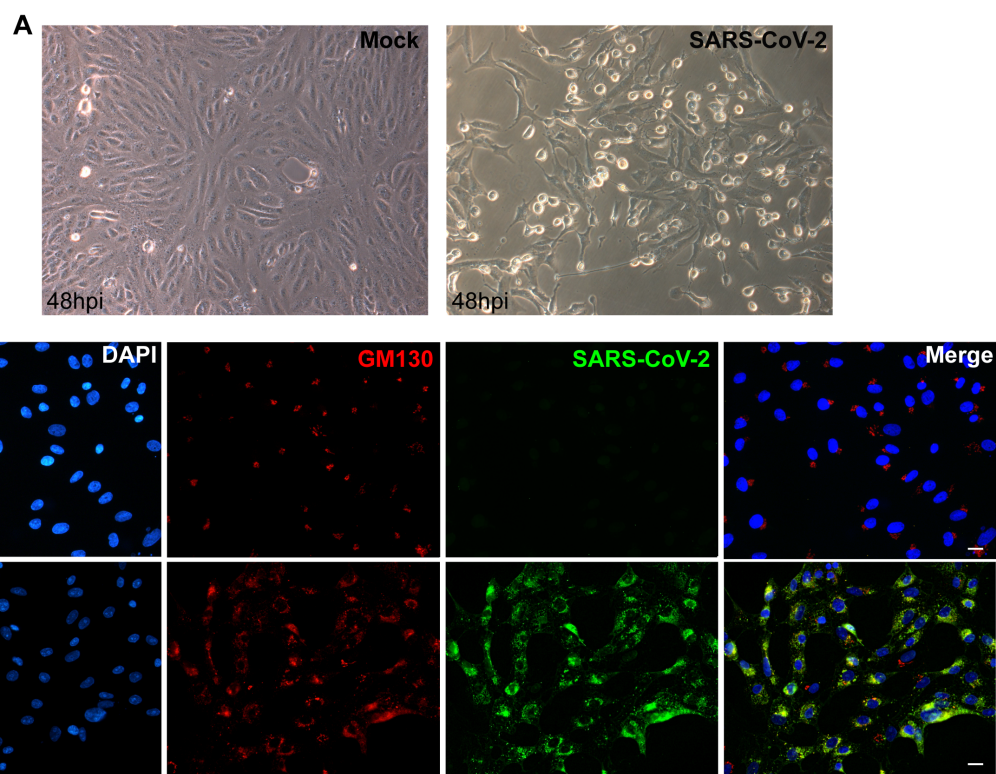



833 **Figure S2**

834

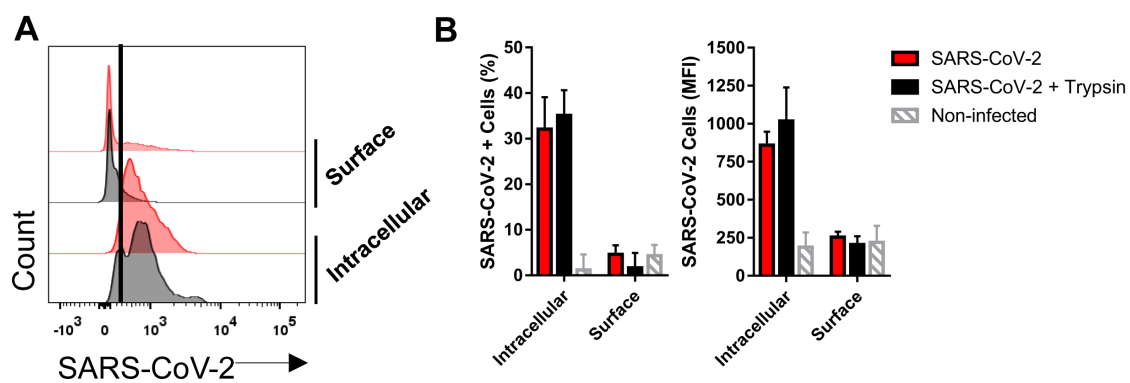

835

836

837 **Figure S3**

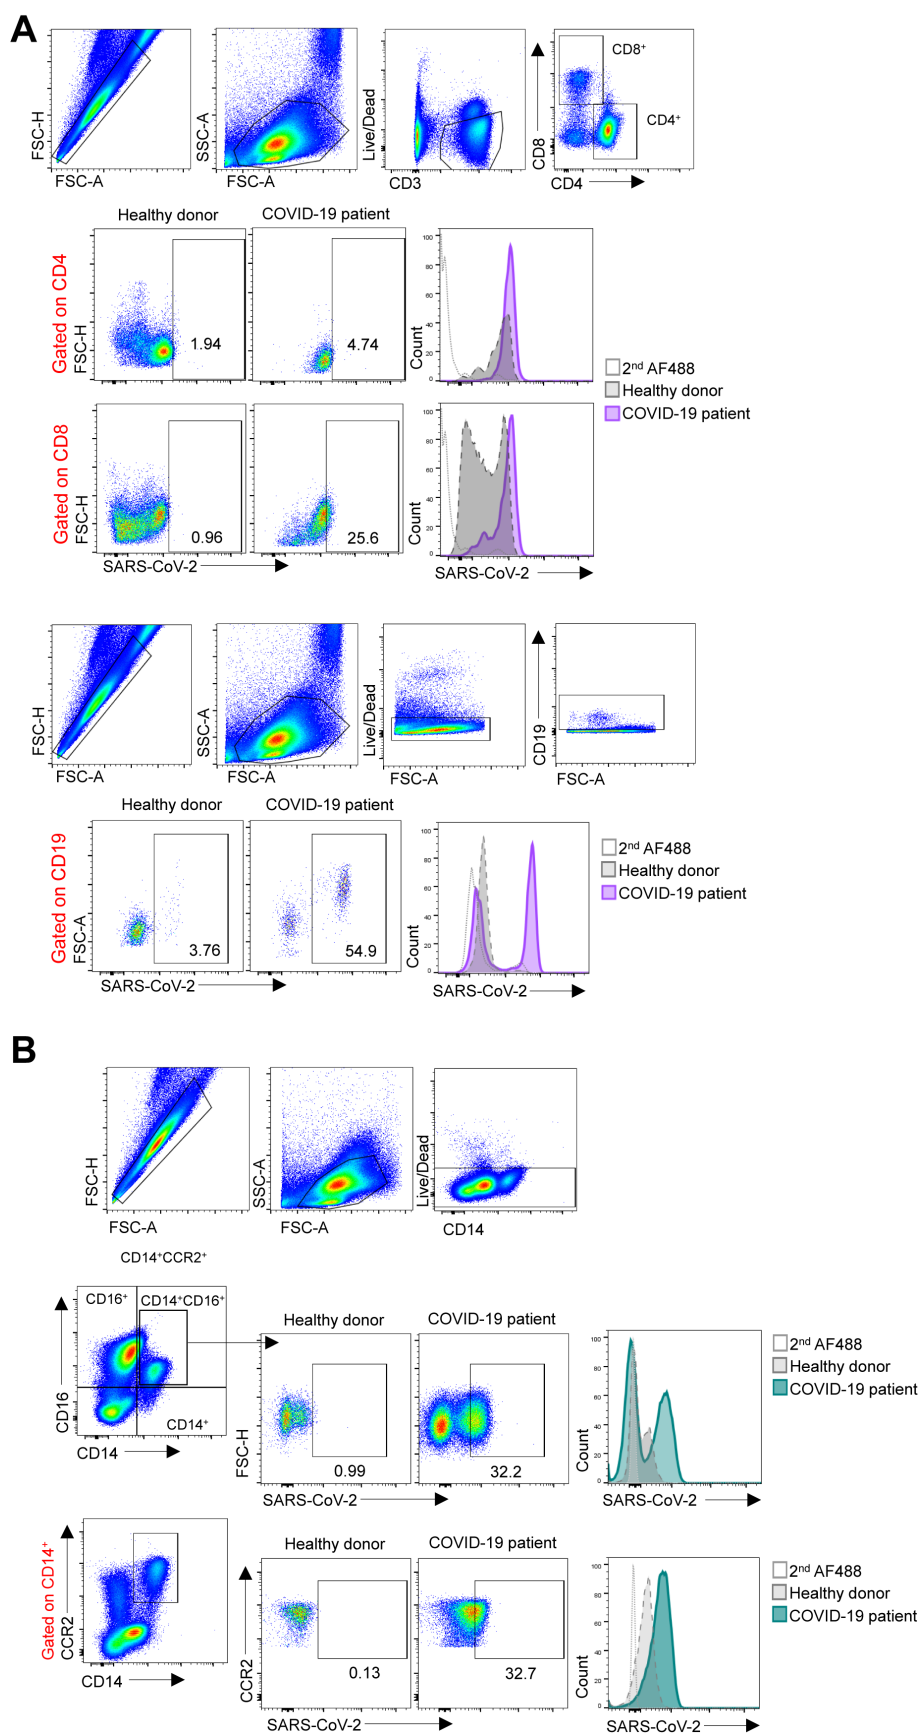

838

839

840 **Figure S4**

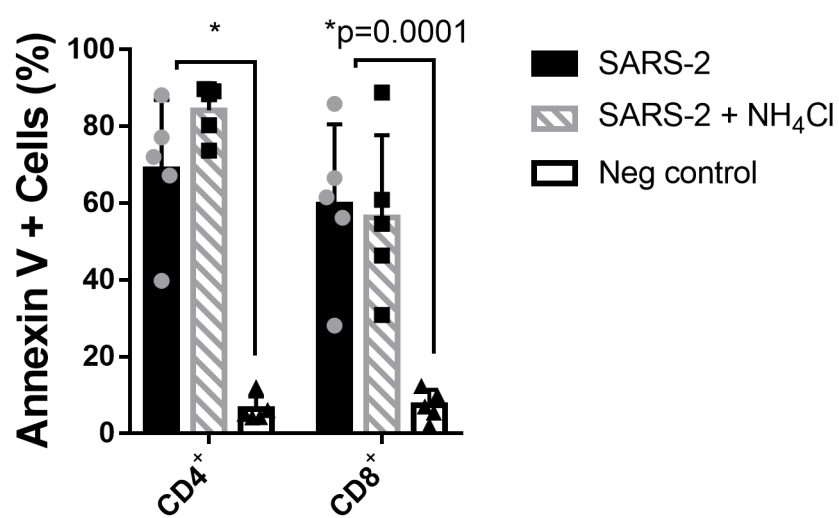

841

842

843 **Figure S5**

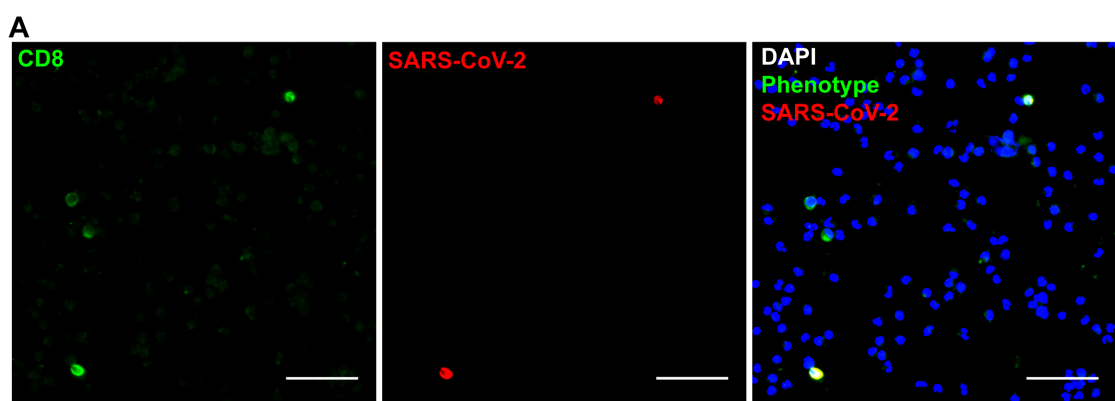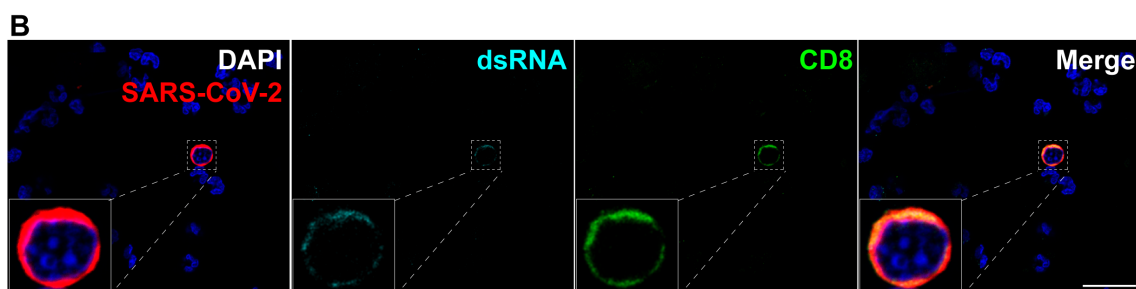

844

845

846

847 **Figure S6**

848

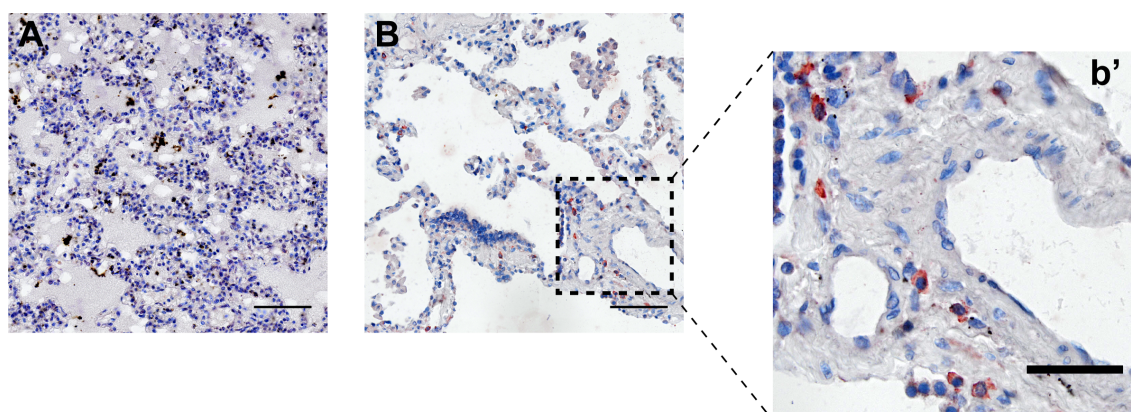

849

850

851

852 **Supplementary Tables**

853

854 **Supplementary Table 1. COVID-19 patient characteristics**

| <b>Demographics</b>                 |                       | <b>%</b> |
|-------------------------------------|-----------------------|----------|
| Number                              | 29                    |          |
| Age (years)                         | 61.89 $\pm$ 17.10     |          |
| Hospital day                        | 9.35 $\pm$ 4.138      |          |
| Female                              | 13                    | 44%      |
| <b>Comorbidities</b>                |                       |          |
| Hypertension                        | 16                    | 55%      |
| Diabetes                            | 13                    | 44%      |
| Obesity                             | 13                    | 44%      |
| Lung disease                        | 4                     | 14%      |
| History of smoking                  | 9                     | 31%      |
| Heart disease                       | 7                     | 24%      |
| Kidney disease                      | 2                     | 7%       |
| History of stroke                   | 2                     | 7%       |
| Cancer                              | 4                     | 14%      |
| Autoimmune diseases                 | 2                     | 7%       |
| Immune deficiency                   | 2                     | 7%       |
| <b>Laboratorial findings</b>        |                       |          |
| CRP (mg/dL)*                        | 14.41 $\pm$ 8.11      |          |
| D-Dimers ( $\mu$ g/mL)**            | 2,244 $\pm$ 1,698     |          |
| LDH (U/L)#                          | 749,4 $\pm$ 490,5     |          |
| Ferritin (ng/mL)&                   | 1,985 $\pm$ 2836      |          |
| Haemoglobin (g/dL)                  | 12.16 $\pm$ 2.62      |          |
| Neutrophils (cell/mm <sup>3</sup> ) | 7,521 $\pm$ 4,952     |          |
| Lymphocytes (cell/mm <sup>3</sup> ) | 1,666 $\pm$ 1,286     |          |
| Platelets (count/mm <sup>3</sup> )  | 231,009 $\pm$ 136,433 |          |
| Image findings (n)                  | 29                    | 100%     |
| <b>Medications</b>                  |                       |          |
| Antibiotics                         | 29                    | 100%     |
| Heparin                             | 29                    | 100%     |
| Antimalarial                        | 3                     | 10%      |
| Oseltamivir                         | 11                    | 37%      |
| Glucocorticoids                     | 16                    | 55%      |
| <b>Respiratory status</b>           |                       |          |
| Mechanical ventilation              | 24                    | 83%      |
| Nasal-cannula oxygen                | 27                    | 93%      |
| Room air                            | 0                     |          |
| pO <sub>2</sub>                     | 70.36 $\pm$ 45.64     |          |
| SatO <sub>2</sub>                   | 82.71 $\pm$ 18.58     |          |
| <b>Outcome</b>                      |                       |          |
| Deaths                              | 9                     | 31%      |

855

856

857

\*CRP: C-reactive protein (Normal value <0.5 mg/dL); \*\*D-dimers (NV <0.5  $\mu$ g/mL); #LDH: lactic dehydrogenase (Normal range: 120-246 U/L); &Ferritin (NR: 10-291 ng/mL)



858

859 **Supplementary Table 2. Viral loads of SARS-CoV-2 in PBMCs from COVID-**  
860 **19 patients tested by real-time RT-PCR**

861

| <b>Patient ID</b>               | <b>Mean viral load<br/>Genome copies/total RNA (<math>\mu\text{g}</math>)</b> |
|---------------------------------|-------------------------------------------------------------------------------|
| P39                             | 68560                                                                         |
| P42                             | 22770                                                                         |
| P43                             | 20782                                                                         |
| P45                             | 36507                                                                         |
| P46                             | 22140                                                                         |
| P47                             | 94736                                                                         |
| P48                             | 26455                                                                         |
| P50                             | 16396                                                                         |
| <b>Mean<math>\pm</math>s.d.</b> | <b>38543<math>\pm</math>28114</b>                                             |

862

863

864
